# Supplementary material
Source: PubMed Central journal article supplement (PMC1589988)
Supplement: 7601300s2.pdf [file 7601300s2.pdf]

## Top 200 gene upregulated in Alb-Cre; HIF1dPA livers relative to Alb-Cre control livers

| Rank | Probe ID     | Gene Name                                                                          |
|------|--------------|------------------------------------------------------------------------------------|
| 1    | 1451385_at   | RIKEN cDNA 2310056P07 gene                                                         |
| 2    | 1439148_a_at | phosphofructokinase, liver, B-type                                                 |
| 3    | 1450081_x_at | Glucose phosphate isomerase 1                                                      |
| 4    | 1420997_a_at | Glucose phosphate isomerase 1                                                      |
| 5    | 1433604_x_at | aldolase 1, A isoform                                                              |
| 6    | 1450269_a_at | Phosphofructokinase, liver, B-type                                                 |
| 7    | 1434814_x_at | glucose phosphate isomerase 1                                                      |
| 8    | 1434799_x_at | aldolase 1, A isoform                                                              |
| 9    | 1416921_x_at | Aldolase 1, A isoform                                                              |
| 10   | 1419023_x_at | Enolase 1, alpha non-neuron                                                        |
| 11   | 1427404_x_at | Enolase 1, alpha non-neuron                                                        |
| 12   | 1439375_x_at | AV030922 Mus musculus cDNA clone 1500016F05                                        |
| 13   | 1416335_at   | Macrophage migration inhibitory factor                                             |
| 14   | 1426554_a_at | phosphoglycerate mutase 1                                                          |
| 15   | 1419022_a_at | Enolase 1, alpha non-neuron                                                        |
| 16   | 1448272_at   | B-cell translocation gene 2, anti-proliferative                                    |
| 17   | 1424399_at   | Uridine-cytidine kinase 1                                                          |
| 18   | 1421679_a_at | Cyclin-dependent kinase inhibitor 1A (P21)                                         |
| 19   | 1416250_at   | B-cell translocation gene 2, anti-proliferative                                    |
| 20   | 1452094_at   | procollagen-proline, 2-oxoglutarate 4-dioxygenase (proline 4-hydroxylase), alpha 1 |
| 21   | 1416069_at   | Phosphofructokinase, platelet                                                      |
| 22   | 1424638_at   | Cyclin-dependent kinase inhibitor 1A (P21)                                         |
| 23   | 1420678_a_at | Interleukin 17 receptor B                                                          |
| 24   | 1452661_at   | Transferrin receptor                                                               |
| 25   | 1434773_a_at | solute carrier family 2 (facilitated glucose transporter), member 1                |
| 26   | 1424937_at   | RIKEN cDNA 2310076L09 gene                                                         |
| 27   | 1424943_at   | cytochrome P450, family 4, subfamily a, polypeptide 10                             |
| 28   | 1419029_at   | Transcribed sequences                                                              |
| 29   | 1417273_at   | Pyruvate dehydrogenase kinase, isoenzyme 4                                         |
| 30   | 1423748_at   | Pyruvate dehydrogenase kinase, isoenzyme 1                                         |
| 31   | 1418649_at   | EGL nine homolog 3 (C. elegans)                                                    |
| 32   | 1454159_a_at | Insulin-like growth factor binding protein 2                                       |
| 33   | 1415691_at   | discs, large homolog 1 (Drosophila)                                                |
| 34   | 1418648_at   | EGL nine homolog 3 (C. elegans)                                                    |

|    |              |                                                                          |
|----|--------------|--------------------------------------------------------------------------|
| 35 | 1419149_at   | Serine (or cysteine) proteinase inhibitor, clade E                       |
| 36 | 1416488_at   | Cyclin G2                                                                |
| 37 | 1449818_at   | ATP-binding cassette, sub-family B (MDR/TAP), member 4                   |
| 38 | 1449442_at   | Peroxisomal biogenesis factor 11a                                        |
| 39 | 1419365_at   | Peroxisomal biogenesis factor 11a                                        |
| 40 | 1451461_a_at | aldolase 3, C isoform                                                    |
| 41 | 1448382_at   | Enoyl-Coenzyme A, hydratase/3-hydroxyacyl Coenzyme A dehydrogenase       |
| 42 | 1427425_at   | RIKEN cDNA D130005A03 gene                                               |
| 43 | 1423747_a_at | Pyruvate dehydrogenase kinase, isoenzyme 1                               |
| 44 | 1436504_x_at | AV027367 Mus musculus cDNA clone 1300008D03                              |
| 45 | 1453128_at   | extra cellular link domain-containing 1                                  |
| 46 | 1417890_at   | Pyridoxal (pyridoxine, vitamin B6) phosphatase                           |
| 47 | 1429159_at   | RIKEN full-length enriched library, clone 9130010F19                     |
| 48 | 1418595_at   | Plasma membrane associated protein, S3-12                                |
| 49 | 1416962_at   | Chromosome condensation 1                                                |
| 50 | 1439036_a_at | AV152334 Mus musculus cDNA clone 2900036A18                              |
| 51 | 1424564_at   | RIKEN cDNA 2410001C21 gene                                               |
| 52 | 1423257_at   | cytochrome P450, family 4, subfamily a, polypeptide 14                   |
| 53 | 1417761_at   | Hypothetical LOC403343                                                   |
| 54 | 1426452_a_at | RAB30, member RAS oncogene family                                        |
| 55 | 1417185_at   | Lymphocyte antigen 6 complex, locus A                                    |
| 56 | 1423890_x_at | ATPase, Na <sup>+</sup> /K <sup>+</sup> transporting, beta 1 polypeptide |
| 57 | 1420693_at   | Myomesin 1                                                               |
| 58 | 1448162_at   | BB250384 RIKEN Mus musculus cDNA clone A730041B10                        |
| 59 | 1451336_at   | lectin, galactose binding, soluble 4                                     |
| 60 | 1425099_a_at | Aryl hydrocarbon receptor nuclear translocator-like                      |
| 61 | 1426857_a_at | RIKEN cDNA 2610207I16 gene                                               |
| 62 | 1417812_a_at | Laminin, beta 3                                                          |
| 63 | 1453287_at   | RIKEN cDNA 5730557B15 gene                                               |
| 64 | 1450395_at   | Solute carrier family 22 (organic cation transporter), member 5          |
| 65 | 1427104_at   | RIKEN cDNA B230354B21 gene                                               |
| 66 | 1425185_at   | RIKEN cDNA 5830417C01 gene                                               |
| 67 | 1417434_at   | Glycerol phosphate dehydrogenase 2, mitochondrial                        |
| 68 | 1449065_at   | Cytosolic acyl-CoA thioesterase 1                                        |
| 69 | 1439399_a_at | BB493265 RIKEN Mus musculus cDNA clone D530032D14                        |
| 70 | 1448700_at   | G0/G1 switch gene 2                                                      |
| 71 | 1448318_at   | Adipose differentiation related protein                                  |

|     |              |                                                                          |
|-----|--------------|--------------------------------------------------------------------------|
| 72  | 1431980_a_at | Arsenic (+3 oxidation state) methyltransferase                           |
| 73  | 1449816_at   | Sulfotransferase family 5A, member 1                                     |
| 74  | 1422997_s_at | Mitochondrial acyl-CoA thioesterase 1                                    |
| 75  | 1424853_s_at | cytochrome P450, family 4, subfamily a, polypeptide 10                   |
| 76  | 1419103_a_at | Abhydrolase domain containing 6                                          |
| 77  | 1429379_at   | extra cellular link domain-containing 1                                  |
| 78  | 1419094_at   | Cytochrome P450, family 2. subfamily c, polypeptide 37                   |
| 79  | 1419144_at   | CD163 antigen                                                            |
| 80  | 1417982_at   | insulin induced gene 2                                                   |
| 81  | 1424716_at   | BB775176 RIKEN Mus musculus cDNA clone G430023N11                        |
| 82  | 1433733_a_at | cryptochrome 1 (photolyase-like)                                         |
| 83  | 1419520_at   | Camello-like 4                                                           |
| 84  | 1434087_at   | 5,10-methylenetetrahydrofolate reductase                                 |
| 85  | 1438118_x_at | AV147875 Mus musculus cDNA clone 2810468P17                              |
| 86  | 1418925_at   | Cadherin EGF LAG seven-pass G-type receptor 1                            |
| 87  | 1418453_a_at | ATPase, Na <sup>+</sup> /K <sup>+</sup> transporting, beta 1 polypeptide |
| 88  | 1420447_at   | Sulfotransferase family 1E, member 1                                     |
| 89  | 1421262_at   | Lipase, endothelial                                                      |
| 90  | 1426663_s_at | Prostate cancer associated protein 6                                     |
| 91  | 1426856_at   | RIKEN cDNA 2610207I16 gene                                               |
| 92  | 1417266_at   | Chemokine (C-C motif) ligand 6                                           |
| 93  | 1417981_at   | insulin induced gene 2                                                   |
| 94  | 1417008_at   | Carnitine acetyltransferase                                              |
| 95  | 1423447_at   | caseinolytic protease X (E.coli)                                         |
| 96  | 1450188_s_at | Lipase, endothelial                                                      |
| 97  | 1434465_x_at | very low density lipoprotein receptor                                    |
| 98  | 1448194_a_at |                                                                          |
| 99  | 1428372_at   | Suppression of tumorigenicity 5                                          |
| 100 | 1417980_a_at | insulin induced gene 2                                                   |
| 101 | 1453836_a_at | Monoglyceride lipase                                                     |
| 102 | 1451787_at   | cytochrome P450, family 2, subfamily b, polypeptide 20                   |
| 103 | 1427347_s_at | Tubulin, beta 2                                                          |
| 104 | 1448383_at   | Matrix metalloproteinase 14 (membrane-inserted)                          |
| 105 | 1455869_at   | 602795823F1 NCI_CGAP_Mam4 Mus musculus cDNA clone IMAGE:4916932          |
| 106 | 1422257_s_at | Cytochrome P450, family 2, subfamily b, polypeptide 20                   |
| 107 | 1431812_a_at | Solute carrier family 6 (neurotransmitter transporter, glycine)          |
| 108 | 1421848_at   | Solute carrier family 22 (organic cation transporter), member 5          |

|     |              |                                                                                  |
|-----|--------------|----------------------------------------------------------------------------------|
| 109 | 1429758_at   | RIKEN cDNA 1700017B05 gene                                                       |
| 110 | 1423062_at   | insulin-like growth factor binding protein 3                                     |
| 111 | 1415996_at   | thioredoxin interacting protein                                                  |
| 112 | 1425645_s_at | cytochrome P450, family 2, subfamily b, polypeptide 20                           |
| 113 | 1449890_at   | RIKEN cDNA 0610033E06 gene                                                       |
| 114 | 1419104_at   | Abhydrolase domain containing 6                                                  |
| 115 | 1430700_a_at | Phospholipase A2, group VII (platelet-activating factor acetylhydrolase, plasma) |
| 116 | 1427127_x_at | heat shock protein 1A                                                            |
| 117 | 1448308_at   | Adaptor-related protein complex 3, mu 1 subunit                                  |
| 118 | 1450747_at   | kelch-like ECH-associated protein 1                                              |
| 119 | 1427473_at   | Glutathione S-transferase, mu 3                                                  |
| 120 | 1435495_at   | myosin binding protein H                                                         |
| 121 | 1452666_a_at | Transmembrane and coiled-coil domains 2                                          |
| 122 | 1455683_a_at | TBC1 domain family, member 8                                                     |
| 123 | 1448591_at   | Cathepsin S                                                                      |
| 124 | 1452318_a_at | heat shock protein 1A                                                            |
| 125 | 1456319_at   | H3034D11-3 NIA Mouse Mus musculus cDNA clone H3034D11                            |
| 126 | 1417951_at   | RIKEN cDNA 1700029K24 gene                                                       |
| 127 | 1427126_at   | heat shock protein 1A                                                            |
| 128 | 1460336_at   | peroxisome proliferative activated receptor, gamma, coactivator 1 alpha          |
| 129 | 1452214_at   | SKI-like                                                                         |
| 130 | 1424359_at   | 5-oxoprolinase (ATP-hydrolysing)                                                 |
| 131 | 1428294_at   | Zinc finger protein 259                                                          |
| 132 | 1418918_at   | Insulin-like growth factor binding protein 1                                     |
| 133 | 1425793_a_at | RAR-related orphan receptor gamma                                                |
| 134 | 1437751_at   | RIKEN cDNA A830037N07 gene                                                       |
| 135 | 1452769_at   | RIKEN cDNA 3732413I11 gene                                                       |
| 136 | 1436186_at   | RIKEN cDNA 4432406C08 gene                                                       |
| 137 | 1454373_x_at | 603300728F1 NCI_CGAP_Mam3 Mus musculus cDNA clone IMAGE:5341110                  |
| 138 | 1434437_x_at | AV301324 RIKEN Mus musculus cDNA clone 5730492P22                                |
| 139 | 1419088_at   | tissue inhibitor of metalloproteinase 3                                          |
| 140 | 1422925_s_at | Peroxisomal acyl-CoA thioesterase 2A                                             |
| 141 | 1425646_at   | CDNA sequence BC016495                                                           |
| 142 | 1424836_a_at | CLIP associating protein 2                                                       |
| 143 | 1452426_x_at | Mus musculus, clone IMAGE:3590633, mRNA, partial cds.                            |
| 144 | 1452418_at   | cDNA clone IMAGE:3972143                                                         |
| 145 | 1417028_a_at | tripartite motif protein 2                                                       |

|     |              |                                                                                   |
|-----|--------------|-----------------------------------------------------------------------------------|
| 146 | 1422916_at   | Fibroblast growth factor 21                                                       |
| 147 | 1431213_a_at | 602394895F1 NIH_MGC_94 Mus musculus cDNA clone IMAGE:4506814                      |
| 148 | 1420836_at   | RIKEN cDNA 4933433D23 gene                                                        |
| 149 | 1450971_at   | Growth arrest and DNA-damage-inducible 45 beta                                    |
| 150 | 1415997_at   | thioredoxin interacting protein                                                   |
| 151 | 1450018_s_at | RIKEN cDNA 4933433D23 gene                                                        |
| 152 | 1434897_a_at | solute carrier family 25 (mitochondrial carrier; adenine nucleotide translocator) |
| 153 | 1427660_x_at | immunoglobulin kappa chain variable 8 (V8)                                        |
| 154 | 1425763_x_at | immunoglobulin heavy chain (J558 family)                                          |
| 155 | 1417654_at   | Syndecan 4                                                                        |
| 156 | 1425933_a_at | 5'-nucleotidase, cytosolic II                                                     |
| 157 | 1428468_at   | RIKEN cDNA 3110043O21 gene                                                        |
| 158 | 1427537_at   | Epiplakin 1                                                                       |
| 159 | 1449773_s_at | a myeloid differentiation primary response                                        |
| 160 | 1427457_a_at | bone morphogenetic protein 1                                                      |
| 161 | 1449007_at   | B-cell translocation gene 3                                                       |
| 162 | 1434340_at   | RIKEN cDNA 1110020P15 gene                                                        |
| 163 | 1422076_at   | Mus musculus cDNA clone IMAGE:988198                                              |
| 164 | 1428306_at   | DNA-damage-inducible transcript 4                                                 |
| 165 | 1418288_at   | Lipin 1                                                                           |
| 166 | 1425551_at   | huntingtin interacting protein 1 related                                          |
| 167 | 1431182_at   | Heat shock protein 8                                                              |
| 168 | 1422077_at   | Mus musculus cDNA clone IMAGE:988198                                              |
| 169 | 1437992_x_at | BB039269 RIKEN Mus musculus cDNA clone 6030441J06                                 |
| 170 | 1460259_s_at | Chloride channel calcium activated 2                                              |
| 171 | 1415989_at   | BB250384 RIKEN Mus musculus cDNA clone A730041B10                                 |
| 172 | 1417017_at   | Cytochrome P450, family 17, subfamily a, polypeptide 1                            |
| 173 | 1417872_at   | Four and a half LIM domains 1                                                     |
| 174 | 1420835_at   | RIKEN cDNA 4933433D23 gene                                                        |
| 175 | 1448830_at   | Dual specificity phosphatase 1                                                    |
| 176 | 1416614_at   | CREBBP/EP300 inhibitory protein 1                                                 |
| 177 | 1424318_at   | RIKEN cDNA 1110067D22 gene                                                        |
| 178 | 1417852_x_at | Chloride channel calcium activated 1                                              |
| 179 | 1424942_a_at | Myelocytomatosis oncogene                                                         |
| 180 | 1420603_s_at | Retinoic acid early transcript 1E                                                 |
| 181 | 1425837_a_at | CCR4 carbon catabolite repression 4-like ( <i>S. cerevisiae</i> )                 |
| 182 | 1423413_at   | N-myc downstream regulated 1                                                      |

|     |              |                                                                                          |
|-----|--------------|------------------------------------------------------------------------------------------|
| 183 | 1428361_x_at | hemoglobin, beta adult major chain                                                       |
| 184 | 1426382_at   | Protein phosphatase 1B, magnesium dependent, beta isoform                                |
| 185 | 1419197_x_at | Hepcidin antimicrobial peptide                                                           |
| 186 | 1416411_at   | Glutathione S-transferase, mu 2                                                          |
| 187 | 1426906_at   | Interferon activated gene 205                                                            |
| 188 | 1423166_at   | CD36 antigen                                                                             |
| 189 | 1456395_at   | RIKEN cDNA A830037N07 gene                                                               |
| 190 | 1452163_at   | E26 avian leukemia oncogene 1, 5' domain                                                 |
| 191 | 1418745_at   | Osteomodulin                                                                             |
| 192 | 1419582_at   | Cytochrome P450, family 2, subfamily c, polypeptide 55                                   |
| 193 | 1423397_at   | UDP-glucuronosyltransferase 2 family, member 5                                           |
| 194 | 1425948_a_at | Solute carrier family 25, member 30                                                      |
| 195 | 1419196_at   | Hepcidin antimicrobial peptide                                                           |
| 196 | 1425483_at   | BB547854 RIKEN Mus musculus cDNA clone E130320N07                                        |
| 197 | 1416808_at   | Nidogen 1                                                                                |
| 198 | 1419491_at   | Defensin beta 1                                                                          |
| 199 | 1421092_at   | Serine (or cysteine) proteinase inhibitor, clade A (alpha-1 antiproteinase, antitrypsin) |
| 200 | 1451743_at   | DNA segment, Chr 19, Wayne State University 162                                          |

## Top 200 gene upregulated in Alb-Cre; HIF2dPA livers relative to Alb-Cre control livers

| Rank | Probe ID     | Gene Name                                                                           |
|------|--------------|-------------------------------------------------------------------------------------|
| 1    | 1419149_at   | Serine (or cysteine) proteinase inhibitor, clade E, member 1                        |
| 2    | 1427473_at   | Glutathione S-transferase, mu 3                                                     |
| 3    | 1417761_at   | Hypothetical LOC403343                                                              |
| 4    | 1420678_a_at | Interleukin 17 receptor B                                                           |
| 5    | 1425567_a_at | Annexin A5                                                                          |
| 6    | 1427474_s_at | Glutathione S-transferase, mu 3                                                     |
| 7    | 1436504_x_at | AV027367 Mus musculus adult C57BL/6J liver Mus musculus cDNA clone 1300008D03       |
| 8    | 1427231_at   | roundabout homolog 1 (Drosophila)                                                   |
| 9    | 1426441_at   | solute carrier family 11 (proton-coupled divalent metal ion transporters), member 2 |
| 10   | 1423550_at   | solute carrier family 1 (glutamate/neutral amino acid transporter), member 4        |
| 11   | 1423549_at   | solute carrier family 1 (glutamate/neutral amino acid transporter), member 4        |
| 12   | 1417017_at   | Cytochrome P450, family 17, subfamily a, polypeptide 1                              |
| 13   | 1434089_at   | synaptopodin                                                                        |
| 14   | 1416811_s_at | Cytotoxic T lymphocyte-associated protein 2 beta                                    |
| 15   | 1449254_at   | Secreted phosphoprotein 1                                                           |
| 16   | 1456616_a_at | AV035166 Mus musculus adult C57BL/6J placenta Mus musculus cDNA clone 1600013O06    |
| 17   | 1418181_at   | Protein tyrosine phosphatase 4a3                                                    |
| 18   | 1448392_at   | Secreted acidic cysteine rich glycoprotein                                          |
| 19   | 1433575_at   | SRY-box containing gene 4                                                           |
| 20   | 1452035_at   | procollagen, type IV, alpha 1                                                       |
| 21   | 1418649_at   | EGL nine homolog 3 (C. elegans)                                                     |
| 22   | 1434437_x_at | AV301324 RIKEN cDNA clone 5730492P22 ibonucleotide reductase M2 subunit mRNA.       |
| 23   | 1424638_at   | Cyclin-dependent kinase inhibitor 1A (P21)                                          |
| 24   | 1452661_at   | Transferrin receptor                                                                |
| 25   | 1448272_at   | B-cell translocation gene 2, anti-proliferative                                     |
| 26   | 1424051_at   | Procollagen, type IV, alpha 2                                                       |
| 27   | 1448471_a_at | Cytotoxic T lymphocyte-associated protein 2 beta                                    |
| 28   | 1421679_a_at | Cyclin-dependent kinase inhibitor 1A (P21)                                          |
| 29   | 1419423_at   | Stabilin 2                                                                          |
| 30   | 1419300_at   | FMS-like tyrosine kinase 1                                                          |
| 31   | 1417500_a_at | Transglutaminase 2, C polypeptide                                                   |
| 32   | 1456003_a_at | solute carrier family 1 (glutamate/neutral amino acid transporter), member 4        |
| 33   | 1425582_a_at | Endomucin                                                                           |
| 34   | 1439148_a_at | phosphofructokinase, liver, B-type                                                  |

|    |              |                                                                                                               |
|----|--------------|---------------------------------------------------------------------------------------------------------------|
| 35 | 1416250_at   | B-cell translocation gene 2, anti-proliferative                                                               |
| 36 | 1460196_at   | Similar to Carbonyl reductase [NADPH] 1 (NADPH-dependent carbonyl reductase 1)                                |
| 37 | 1424375_s_at | GTPase, IMAP family member 4 (Gimap4)                                                                         |
| 38 | 1418648_at   | EGL nine homolog 3 (C. elegans)                                                                               |
| 39 | 1448162_at   | BB250384 RIKEN cDNA clone A730041B10 Mouse vascular cell adhesion molecule-1                                  |
| 40 | 1433604_x_at | aldolase 1, A isoform                                                                                         |
| 41 | 1426348_at   | procollagen, type IV, alpha 1                                                                                 |
| 42 | 1417273_at   | Pyruvate dehydrogenase kinase, isoenzyme 4                                                                    |
| 43 | 1425933_a_at | 5'-nucleotidase, cytosolic II                                                                                 |
| 44 | 1418946_at   | ST3 beta-galactoside alpha-2,3-sialyltransferase 1                                                            |
| 45 | 1424399_at   | Uridine-cytidine kinase 1                                                                                     |
| 46 | 1416498_at   | Peptidylprolyl isomerase C                                                                                    |
| 47 | 1453128_at   | extra cellular link domain-containing 1                                                                       |
| 48 | 1418075_at   | ST6 (alpha-N-acetyl-neuraminy1-2,3-beta-galactosyl-1,3)-N-acetylgalactosaminide alpha-2,6-sialyltransferase 4 |
| 49 | 1434719_at   | alpha-2-macroglobulin                                                                                         |
| 50 | 1429379_at   | extra cellular link domain-containing 1                                                                       |
| 51 | 1448605_at   | Ras homolog gene family, member C                                                                             |
| 52 | 1437226_x_at | MARCKS-like protein                                                                                           |
| 53 | 1416411_at   | Glutathione S-transferase, mu 2                                                                               |
| 54 | 1451008_at   | BB360510 RIKEN cDNA clone C030047J18 alpha2,8-sialyltransferase                                               |
| 55 | 1444052_at   | FMS-like tyrosine kinase 4                                                                                    |
| 56 | 1452666_a_at | Transmembrane and coiled-coil domains 2                                                                       |
| 57 | 1450269_a_at | Phosphofructokinase, liver, B-type                                                                            |
| 58 | 1423166_at   | CD36 antigen                                                                                                  |
| 59 | 1418918_at   | Insulin-like growth factor binding protein 1                                                                  |
| 60 | 1417821_at   | DNA segment, Chr 17, human D6S56E 5                                                                           |
| 61 | 1448188_at   | Uncoupling protein 2 (mitochondrial, proton carrier)                                                          |
| 62 | 1434799_x_at | aldolase 1, A isoform                                                                                         |
| 63 | 1449335_at   | tissue inhibitor of metalloproteinase 3                                                                       |
| 64 | 1433428_x_at | transglutaminase 2, C polypeptide                                                                             |
| 65 | 1417982_at   | insulin induced gene 2                                                                                        |
| 66 | 1448383_at   | Matrix metalloproteinase 14 (membrane-inserted)                                                               |
| 67 | 1420965_a_at | ectodermal-neural cortex 1                                                                                    |
| 68 | 1423140_at   | lysosomal acid lipase 1                                                                                       |
| 69 | 1423484_at   | bicaudal C homolog 1 (Drosophila)                                                                             |
| 70 | 1416572_at   | Matrix metalloproteinase 14 (membrane-inserted)                                                               |
| 71 | 1449890_at   | RIKEN cDNA 0610033E06 gene                                                                                    |



|     |              |                                                                                             |
|-----|--------------|---------------------------------------------------------------------------------------------|
| 72  | 1451475_at   | plexin D1                                                                                   |
| 73  | 1416921_x_at | Aldolase 1, A isoform                                                                       |
| 74  | 1416589_at   | Secreted acidic cysteine rich glycoprotein                                                  |
| 75  | 1450641_at   | Vimentin                                                                                    |
| 76  | 1419089_at   | tissue inhibitor of metalloproteinase 3                                                     |
| 77  | 1416268_at   | E26 avian leukemia oncogene 2, 3' domain                                                    |
| 78  | 1451428_x_at | EGF-like domain 7 (Egfl7), transcript variant c                                             |
| 79  | 1419247_at   | Regulator of G-protein signaling 2                                                          |
| 80  | 1438559_x_at | BB145101 RIKEN cDNA clone 9930028G13                                                        |
| 81  | 1419573_a_at | Lectin, galactose binding, soluble 1                                                        |
| 82  | 1455582_at   | C1q and tumor necrosis factor related protein 1                                             |
| 83  | 1448416_at   | Matrix gamma-carboxyglutamate (gla) protein                                                 |
| 84  | 1428108_x_at | Transmembrane and coiled-coil domains 2                                                     |
| 85  | 1455069_x_at | solute carrier family 25 (mitochondrial carrier; adenine nucleotide translocator), member 4 |
| 86  | 1438118_x_at | AV147875 Mus musculus C57BL/6J 10-11 day embryo Mus musculus cDNA clone 2810468P17          |
| 87  | 1449818_at   | ATP-binding cassette, sub-family B (MDR/TAP), member 4                                      |
| 88  | 1455900_x_at | BB041811 RIKEN cDNA clone 6030458C10 transglutaminase (TGase)                               |
| 89  | 1424485_at   | Angiopoietin-like 3                                                                         |
| 90  | 1451110_at   | EGL nine homolog 1 (C. elegans)                                                             |
| 91  | 1415989_at   | BB250384 RIKEN cDNA clone A730041B10 Mouse vascular cell adhesion molecule-1                |
| 92  | 1435394_s_at | ras homolog gene family, member C                                                           |
| 93  | 1426910_at   | PRKC, apoptosis, WT1, regulator                                                             |
| 94  | 1415972_at   | myristoylated alanine rich protein kinase C substrate                                       |
| 95  | 1451263_a_at | Fatty acid binding protein 4, adipocyte                                                     |
| 96  | 1434034_at   | ceramide kinase                                                                             |
| 97  | 1449106_at   | Glutathione peroxidase 3                                                                    |
| 98  | 1433956_at   | cadherin 5                                                                                  |
| 99  | 1421267_a_at | Cbp/p300-interacting transactivator, with Glu/Asp-rich carboxy-terminal domain, 2           |
| 100 | 1419589_at   | complement component 1, q subcomponent, receptor 1                                          |
| 101 | 1416922_a_at | BCL2/adenovirus E1B 19kDa-interacting protein 3-like                                        |
| 102 | 1418187_at   | Receptor (calcitonin) activity modifying protein 2                                          |
| 103 | 1424962_at   | Transmembrane 4 superfamily member 4                                                        |
| 104 | 1417023_a_at | Fatty acid binding protein 4, adipocyte                                                     |
| 105 | 1448182_a_at | CD24a antigen                                                                               |
| 106 | 1437277_x_at | transglutaminase 2, C polypeptide                                                           |
| 107 | 1460356_at   | Endothelial cell-specific adhesion molecule                                                 |
| 108 | 1434897_a_at | solute carrier family 25 (mitochondrial carrier; adenine nucleotide translocator), member 4 |

109 1439375\_x\_at AV030922 Mus musculus adult C57BL/6J cerebellum Mus musculus cDNA clone 1500016F05  
110 1415919\_at Neural proliferation, differentiation and control gene 1  
111 1450699\_at Selenium binding protein 1  
112 1460444\_at arrestin, beta 1  
113 1416923\_a\_at BCL2/adenovirus E1B 19kDa-interacting protein 3-like  
114 1455587\_at hypothetical protein MGC29254  
115 1426832\_at RIKEN cDNA 6330505F04 gene  
116 1421027\_a\_at myocyte enhancer factor 2C  
117 1455439\_a\_at lectin, galactose binding, soluble 1  
118 1450199\_a\_at Stabilin 1  
119 1424250\_a\_at Rho guanine nucleotide exchange factor (GEF) 3  
120 1449110\_at Ras homolog gene family, member B  
121 1420911\_a\_at Milk fat globule-EGF factor 8 protein  
122 1419248\_at Regulator of G-protein signaling 2  
123 1427866\_x\_at beta globin  
124 1450884\_at CD36 antigen  
125 1448525\_a\_at BCL2/adenovirus E1B 19kDa-interacting protein 3-like  
126 1437308\_s\_at AV024285 Mus musculus adult C57BL/6J lung Mus musculus cDNA clone 1200001P22  
127 1452784\_at integrin alpha V  
128 1417894\_at  
129 1423141\_at lysosomal acid lipase 1  
130 1426004\_a\_at Transglutaminase 2, C polypeptide  
131 1418554\_at Adrenomedullin receptor  
132 1456739\_x\_at BB392869 RIKEN cDNA clone C230080O14  
133 1423584\_at polymerase (RNA) II (DNA directed) polypeptide B  
134 1450883\_a\_at CD36 antigen  
135 1421814\_at Moesin  
136 1417327\_at Caveolin 2  
137 1416609\_at CDNA sequence BC004004  
138 1448226\_at Ribonucleotide reductase M2  
139 1419737\_a\_at Lactate dehydrogenase 1, A chain  
140 1420653\_at Transforming growth factor, beta 1  
141 1417981\_at insulin induced gene 2  
142 1415906\_at Thymosin, beta 4, X chromosome  
143 1424937\_at RIKEN cDNA 2310076L09 gene  
144 1417308\_at Pyruvate kinase, muscle  
145 1417558\_at Fyn proto-oncogene

|     |              |                                                                                                       |
|-----|--------------|-------------------------------------------------------------------------------------------------------|
| 146 | 1423257_at   | cytochrome P450, family 4, subfamily a, polypeptide 14                                                |
| 147 | 1416041_at   | Serum/glucocorticoid regulated kinase                                                                 |
| 148 | 1426514_at   | RIKEN cDNA 4631426J05 gene                                                                            |
| 149 | 1452246_at   | RIKEN cDNA 1110034N17 gene                                                                            |
| 150 | 1426951_at   | cysteine-rich motor neuron 1                                                                          |
| 151 | 1417379_at   | IQ motif containing GTPase activating protein 1                                                       |
| 152 | 1450958_at   | transmembrane 4 superfamily member 1                                                                  |
| 153 | 1449401_at   | Complement component 1, q subcomponent, gamma polypeptide                                             |
| 154 | 1416808_at   | Nidogen 1                                                                                             |
| 155 | 1419872_at   | c-fms proto-oncogene (MOUSE)                                                                          |
| 156 | 1448119_at   | 2,3-bisphosphoglycerate mutase                                                                        |
| 157 | 1455504_a_at | makorin, ring finger protein, 1                                                                       |
| 158 | 1452143_at   | spectrin beta 2                                                                                       |
| 159 | 1437724_x_at | BB206460 RIKEN cDNA clone A430075P20 membrane-associated phosphatidylinositol transfer protein (mpt1) |
| 160 | 1452889_at   | Similar to phospholysine phosphohistidine inorganic pyrophosphate phosphata (LOC384677), mRNA         |
| 161 | 1450852_s_at | coagulation factor II (thrombin) receptor                                                             |
| 162 | 1452352_at   | trophoblast specific protein beta                                                                     |
| 163 | 1417839_at   | Claudin 5                                                                                             |
| 164 | 1448213_at   | RIKEN cDNA C430014K04 gene                                                                            |
| 165 | 1427391_a_at | cytochrome c oxidase, subunit VIIa 2                                                                  |
| 166 | 1416034_at   | CD24a antigen                                                                                         |
| 167 | 1423569_at   | glycine amidinotransferase (L-arginine:glycine amidinotransferase)                                    |
| 168 | 1433883_at   | RIKEN clone:C430002D13 product:TROPOMYOSIN 4 homolog                                                  |
| 169 | 1451355_at   | Cancer related gene-liver 1                                                                           |
| 170 | 1418826_at   | Membrane-spanning 4-domains, subfamily A, member 6B                                                   |
| 171 | 1449905_at   | C-type lectin domain family 4, member f                                                               |
| 172 | 1418892_at   | Ras homolog gene family, member J                                                                     |
| 173 | 1448318_at   | Adipose differentiation related protein                                                               |
| 174 | 1417355_at   | Paternally expressed 3                                                                                |
| 175 | 1426858_at   | inhibin beta-B                                                                                        |
| 176 | 1417980_a_at | insulin induced gene 2                                                                                |
| 177 | 1426799_at   | RAB8B, member RAS oncogene family                                                                     |
| 178 | 1416953_at   | Connective tissue growth factor                                                                       |
| 179 | 1417300_at   | Sphingomyelin phosphodiesterase, acid-like 3B                                                         |
| 180 | 1428361_x_at | RIKEN clone:2510049A20 product:hemoglobin, beta adult major chain                                     |
| 181 | 1438001_x_at | deleted in polyposis 1                                                                                |
| 182 | 1423986_a_at | scotin gene (Scotin)                                                                                  |

183 1449059\_a\_at 3-oxoacid CoA transferase 1  
184 1421009\_at RIKEN cDNA 2510004L01 gene  
185 1416985\_at RIKEN cDNA 2900076A13 gene  
186 1448737\_at Transmembrane 4 superfamily member 2  
187 1416779\_at serum deprivation response  
188 1449551\_at Myosin IC  
189 1419706\_a\_at A kinase (PRKA) anchor protein (gravin) 12  
190 1415922\_s\_at MARCKS-like protein  
191 1448184\_at FK506 binding protein 1a  
192 1423760\_at CD44 antigen  
193 1419398\_a\_at Deleted in polyposis 1  
194 1449146\_at Notch gene homolog 4 (Drosophila)  
195 1419365\_at Peroxisomal biogenesis factor 11a  
196 1454971\_x\_at Transcribed sequences  
197 1427442\_a\_at Amyloid beta (A4) precursor protein  
198 1416238\_at Tyrosine kinase receptor 1  
199 1452078\_a\_at solute carrier family 11 (proton-coupled divalent metal ion transporters), member 2  
200 1450872\_s\_at lysosomal acid lipase 1

### Top 200 gene upregulated in Alb-Cre; HIF1dPA / HIF2dPA livers relative to Alb-Cre control livers

| Rank | Probe ID     | Gene Name                                                                           |
|------|--------------|-------------------------------------------------------------------------------------|
| 1    | 1417761_at   | Hypothetical LOC403343                                                              |
| 2    | 1436504_x_at | AV027367 Mus musculus adult C57BL/6J liver Mus musculus cDNA clone 1300008D03       |
| 3    | 1417017_at   | Cytochrome P450, family 17, subfamily a, polypeptide 1                              |
| 4    | 1415864_at   | 2,3-bisphosphoglycerate mutase                                                      |
| 5    | 1417500_a_at | Transglutaminase 2, C polypeptide                                                   |
| 6    | 1415865_s_at | 2,3-bisphosphoglycerate mutase                                                      |
| 7    | 1436853_a_at | Mus musculus cDNA clone IMAGE:443671 3' similar to gb:L08850 SYNUCLEIN (HUMAN)      |
| 8    | 1434437_x_at | RIKEN cDNA clone 5730492P22 ribonucleotide reductase M2 subunit mRNA                |
| 9    | 1448226_at   | Ribonucleotide reductase M2                                                         |
| 10   | 1427231_at   | roundabout homolog 1 (Drosophila)                                                   |
| 11   | 1449254_at   | Secreted phosphoprotein 1                                                           |
| 12   | 1421009_at   | RIKEN cDNA 2510004L01 gene                                                          |
| 13   | 1417300_at   | Sphingomyelin phosphodiesterase, acid-like 3B                                       |
| 14   | 1436058_at   | RIKEN cDNA 2510004L01 gene                                                          |
| 15   | 1456616_a_at | AV035166 Mus musculus adult C57BL/6J placenta Mus musculus cDNA clone 1600013O06    |
| 16   | 1418493_a_at | Synuclein, alpha                                                                    |
| 17   | 1455504_a_at | makorin, ring finger protein, 1                                                     |
| 18   | 1416034_at   | CD24a antigen                                                                       |
| 19   | 1450379_at   | Moesin                                                                              |
| 20   | 1417750_a_at | Mitochondrial solute carrier protein                                                |
| 21   | 1448416_at   | Matrix gamma-carboxyglutamate (gla) protein                                         |
| 22   | 1426441_at   | solute carrier family 11 (proton-coupled divalent metal ion transporters), member 2 |
| 23   | 1418649_at   | EGL nine homolog 3 (C. elegans)                                                     |
| 24   | 1424962_at   | Transmembrane 4 superfamily member 4                                                |
| 25   | 1450883_a_at | CD36 antigen                                                                        |
| 26   | 1419569_a_at | Interferon-stimulated protein                                                       |
| 27   | 1427474_s_at | Glutathione S-transferase, mu 3                                                     |
| 28   | 1433604_x_at | aldolase 1, A isoform                                                               |
| 29   | 1421008_at   | RIKEN cDNA 2510004L01 gene                                                          |
| 30   | 1423166_at   | CD36 antigen                                                                        |
| 31   | 1423584_at   | polymerase (RNA) II (DNA directed) polypeptide B                                    |
| 32   | 1426004_a_at | Transglutaminase 2, C polypeptide                                                   |
| 33   | 1448605_at   | Ras homolog gene family, member C                                                   |
| 34   | 1419423_at   | Stabilin 2                                                                          |

|    |              |                                                                                                              |
|----|--------------|--------------------------------------------------------------------------------------------------------------|
| 35 | 1433765_at   | RIKEN cDNA B230113M03 gene                                                                                   |
| 36 | 1448021_at   | Transcribed sequences                                                                                        |
| 37 | 1450699_at   | Selenium binding protein 1                                                                                   |
| 38 | 1448392_at   | Secreted acidic cysteine rich glycoprotein                                                                   |
| 39 | 1449551_at   | Myosin IC                                                                                                    |
| 40 | 1418435_at   | makorin, ring finger protein, 1                                                                              |
| 41 | 1418075_at   | ST6 (alpha-N-acetyl-neuraminy-2,3-beta-galactosyl-1,3)-N-acetylgalactosaminide alpha-2,6-sialyltransferase 4 |
| 42 | 1419149_at   | Serine (or cysteine) proteinase inhibitor, clade E, member 1                                                 |
| 43 | 1450430_at   | Mannose receptor, C type 1                                                                                   |
| 44 | 1451975_at   | RIKEN cDNA 2810453I06 gene (2810453I06Rik)                                                                   |
| 45 | 1433428_x_at | transglutaminase 2, C polypeptide                                                                            |
| 46 | 1421442_at   | FMS-like tyrosine kinase 4                                                                                   |
| 47 | 1450884_at   | CD36 antigen                                                                                                 |
| 48 | 1423586_at   | AXL receptor tyrosine kinase                                                                                 |
| 49 | 1460196_at   | Similar to Carbonyl reductase [NADPH] 1 (NADPH-dependent carbonyl reductase 1)                               |
| 50 | 1451110_at   | EGL nine homolog 1 (C. elegans)                                                                              |
| 51 | 1424638_at   | Cyclin-dependent kinase inhibitor 1A (P21)                                                                   |
| 52 | 1437277_x_at | transglutaminase 2, C polypeptide                                                                            |
| 53 | 1415972_at   | myristoylated alanine rich protein kinase C substrate                                                        |
| 54 | 1434089_at   | synaptopodin                                                                                                 |
| 55 | 1448525_a_at | BCL2/adenovirus E1B 19kDa-interacting protein 3-like                                                         |
| 56 | 1416923_a_at | BCL2/adenovirus E1B 19kDa-interacting protein 3-like                                                         |
| 57 | 1416268_at   | E26 avian leukemia oncogene 2, 3' domain                                                                     |
| 58 | 1451428_x_at | EGF-like domain 7 (Egfl7), transcript variant c                                                              |
| 59 | 1421198_at   | Integrin alpha V                                                                                             |
| 60 | 1452784_at   | integrin alpha V                                                                                             |
| 61 | 1415906_at   | Thymosin, beta 4, X chromosome                                                                               |
| 62 | 1418648_at   | EGL nine homolog 3 (C. elegans)                                                                              |
| 63 | 1427062_at   | RIKEN cDNA 9930104E21 gene                                                                                   |
| 64 | 1448119_at   | 2,3-bisphosphoglycerate mutase                                                                               |
| 65 | 1416921_x_at | Aldolase 1, A isoform                                                                                        |
| 66 | 1427866_x_at | transcript down-regulated by Coxsackievirus B3 infection; Mus musculus beta globin                           |
| 67 | 1425567_a_at | Annexin A5                                                                                                   |
| 68 | 1420909_at   | Vascular endothelial growth factor A                                                                         |
| 69 | 1421287_a_at | Platelet/endothelial cell adhesion molecule 1                                                                |
| 70 | 1419300_at   | FMS-like tyrosine kinase 1                                                                                   |
| 71 | 1427473_at   | Glutathione S-transferase, mu 3                                                                              |

|     |              |                                                                                                        |
|-----|--------------|--------------------------------------------------------------------------------------------------------|
| 72  | 1416092_a_at | microtubule-associated protein 4                                                                       |
| 73  | 1455900_x_at | RIKEN cDNA clone 6030458C10 transglutaminase (TGase)                                                   |
| 74  | 1439148_a_at | phosphofructokinase, liver, B-type                                                                     |
| 75  | 1417063_at   | Complement component 1, q subcomponent, beta polypeptide                                               |
| 76  | 1454613_at   | Transcribed sequence with strong similarity to proteinDPY3_HUMAN Dihydropyrimidinase related protein-3 |
| 77  | 1424186_at   | RIKEN cDNA 2610001E17 gene                                                                             |
| 78  | 1416410_at   | Platelet-activating factor acetylhydrolase, isoform 1b, alpha1 subunit                                 |
| 79  | 1451008_at   | RIKEN cDNA clone C030047J18 alpha2,8-sialyltransferase                                                 |
| 80  | 1417633_at   | Superoxide dismutase 3, extracellular                                                                  |
| 81  | 1419872_at   | c-fms proto-oncogene (MOUSE)                                                                           |
| 82  | 1416609_at   | CDNA sequence BC004004                                                                                 |
| 83  | 1418187_at   | Receptor (calcitonin) activity modifying protein 2                                                     |
| 84  | 1416120_at   | Ribonucleotide reductase M2                                                                            |
| 85  | 1437226_x_at | MARCKS-like protein                                                                                    |
| 86  | 1424051_at   | Procollagen, type IV, alpha 2                                                                          |
| 87  | 1460285_at   | Integrin alpha 9                                                                                       |
| 88  | 1437502_x_at | RIKEN cDNA clone E530111O22 M.musculus mRNA for heat stable antigen                                    |
| 89  | 1417839_at   | Claudin 5                                                                                              |
| 90  | 1426239_s_at | Arrestin, beta 2                                                                                       |
| 91  | 1427011_a_at | LanC (bacterial lantibiotic synthetase component C)-like 1                                             |
| 92  | 1426348_at   | procollagen, type IV, alpha 1                                                                          |
| 93  | 1418918_at   | Insulin-like growth factor binding protein 1                                                           |
| 94  | 1448182_a_at | CD24a antigen                                                                                          |
| 95  | 1427889_at   | spectrin alpha 2                                                                                       |
| 96  | 1448737_at   | Transmembrane 4 superfamily member 2                                                                   |
| 97  | 1444052_at   | FMS-like tyrosine kinase 4                                                                             |
| 98  | 1419279_at   | Phosphatidylinositol-4-phosphate 5-kinase, type II, alpha                                              |
| 99  | 1420678_a_at | Interleukin 17 receptor B                                                                              |
| 100 | 1415919_at   | Neural proliferation, differentiation and control gene 1                                               |
| 101 | 1415971_at   | myristoylated alanine rich protein kinase C substrate                                                  |
| 102 | 1448592_at   | Cartilage associated protein                                                                           |
| 103 | 1448188_at   | Uncoupling protein 2 (mitochondrial, proton carrier)                                                   |
| 104 | 1421031_a_at | RIKEN cDNA 2310016C08 gene                                                                             |
| 105 | 1436921_at   | ATPase, Cu <sup>++</sup> transporting, alpha polypeptide                                               |
| 106 | 1422047_at   | Cadherin 5                                                                                             |
| 107 | 1456700_x_at | RIKEN cDNA clone 9430074M04                                                                            |
| 108 | 1416238_at   | Tyrosine kinase receptor 1                                                                             |

|     |              |                                                           |
|-----|--------------|-----------------------------------------------------------|
| 109 | 1416985_at   | RIKEN cDNA 2900076A13 gene                                |
| 110 | 1452246_at   | RIKEN cDNA 1110034N17 gene                                |
| 111 | 1448942_at   | Guanine nucleotide binding protein (G protein), gamma 11  |
| 112 | 1454268_a_at | Cytochrome b-245, alpha polypeptide                       |
| 113 | 1415922_s_at | MARCKS-like protein                                       |
| 114 | 1418762_at   | Decay accelerating factor 1                               |
| 115 | 1419030_at   | Transcribed sequences                                     |
| 116 | 1449401_at   | Complement component 1, q subcomponent, gamma polypeptide |
| 117 | 1450269_a_at | Phosphofructokinase, liver, B-type                        |
| 118 | 1419649_s_at | Myosin IC                                                 |
| 119 | 1423885_at   | laminin, gamma 1                                          |
| 120 | 1449164_at   | CD68 antigen                                              |
| 121 | 1455587_at   | hypothetical protein MGC29254                             |
| 122 | 1448364_at   | Cyclin G2                                                 |
| 123 | 1455582_at   | C1q and tumor necrosis factor related protein 1           |
| 124 | 1425125_at   | Oncoprotein induced transcript 3                          |
| 125 | 1415973_at   | myristoylated alanine rich protein kinase C substrate     |
| 126 | 1418554_at   | Adrenomedullin receptor                                   |
| 127 | 1416779_at   | serum deprivation response                                |
| 128 | 1433490_s_at | erythrocyte protein band 4.1-like 2                       |
| 129 | 1417311_at   | Cysteine rich protein 2                                   |
| 130 | 1433956_at   | cadherin 5                                                |
| 131 | 1420653_at   | Transforming growth factor, beta 1                        |
| 132 | 1450029_s_at | Integrin alpha 9                                          |
| 133 | 1448184_at   | FK506 binding protein 1a                                  |
| 134 | 1417558_at   | Fyn proto-oncogene                                        |
| 135 | 1452661_at   | Transferrin receptor                                      |
| 136 | 1448839_at   | DNA segment, Chr 17, ERATO Doi 288, expressed             |
| 137 | 1421814_at   | Moesin                                                    |
| 138 | 1438958_x_at | RIKEN cDNA clone 7120478O14FK506-binding protein          |
| 139 | 1417900_a_at | Very low density lipoprotein receptor                     |
| 140 | 1433741_at   | CD38 antigen                                              |
| 141 | 1449193_at   | CD5 antigen-like                                          |
| 142 | 1419873_s_at | c-fms proto-oncogene (MOUSE)                              |
| 143 | 1452352_at   | trophoblast specific protein beta                         |
| 144 | 1416498_at   | Peptidylprolyl isomerase C                                |
| 145 | 1451475_at   | plexin D1                                                 |



|     |              |                                                                                                              |
|-----|--------------|--------------------------------------------------------------------------------------------------------------|
| 146 | 1460444_at   | arrestin, beta 1                                                                                             |
| 147 | 1419280_at   | Phosphatidylinositol-4-phosphate 5-kinase, type II, alpha                                                    |
| 148 | 1416488_at   | Cyclin G2                                                                                                    |
| 149 | 1452432_at   | tissue factor pathway inhibitor                                                                              |
| 150 | 1428361_x_at | RIKEN full-length enriched library, clone:2510049A20 product:hemoglobin, beta adult major chain              |
| 151 | 1449135_at   | SRY-box containing gene 18                                                                                   |
| 152 | 1417010_at   | Zinc finger protein 238                                                                                      |
| 153 | 1417821_at   | DNA segment, Chr 17, human D6S56E 5                                                                          |
| 154 | 1426725_s_at | E26 avian leukemia oncogene 1, 5' domain                                                                     |
| 155 | 1417172_at   | Ubiquitin-conjugating enzyme E2L 6                                                                           |
| 156 | 1425840_a_at | Sema domain, immunoglobulin domain (Ig), short basic domain, secreted, (semaphorin) 3 F                      |
| 157 | 1452514_a_at | Kit oncogene                                                                                                 |
| 158 | 1437726_x_at | RIKEN cDNA clone 9530029K06 complement protein C1q B-chain                                                   |
| 159 | 1418059_at   | EGF, latrophilin seven transmembrane domain containing 1                                                     |
| 160 | 1423785_at   | EGL nine homolog 1 (C. elegans)                                                                              |
| 161 | 1452163_at   | E26 avian leukemia oncogene 1, 5' domain                                                                     |
| 162 | 1419356_at   | Kruppel-like factor 7 (ubiquitous)                                                                           |
| 163 | 1424130_a_at | Mus musculus mRNA similar to polymerase I and transcript release factor (cDNA clone MGC:13867 IMAGE:4206082) |
| 164 | 1452035_at   | procollagen, type IV, alpha 1                                                                                |
| 165 | 1449379_at   | Kinase insert domain protein receptor                                                                        |
| 166 | 1426554_a_at | phosphoglycerate mutase 1                                                                                    |
| 167 | 1451651_at   | V-set and immunoglobulin domain containing 4                                                                 |
| 168 | 1456196_x_at | AV038603 Mus musculus adult C57BL/6J placenta Mus musculus cDNA clone 1600030J05                             |
| 169 | 1425582_a_at | Endomucin                                                                                                    |
| 170 | 1416922_a_at | BCL2/adenovirus E1B 19kDa-interacting protein 3-like                                                         |
| 171 | 1419029_at   | Transcribed sequences                                                                                        |
| 172 | 1435477_s_at | Fc receptor, IgG, low affinity IIb                                                                           |
| 173 | 1422620_s_at | phosphatidic acid phosphatase 2a (Ppap2a)                                                                    |
| 174 | 1450650_at   | myosin X                                                                                                     |
| 175 | 1434799_x_at | aldolase 1, A isoform                                                                                        |
| 176 | 1416778_at   | serum deprivation response                                                                                   |
| 177 | 1451425_a_at | Makorin, ring finger protein, 1                                                                              |
| 178 | 1417271_a_at | Endoglin                                                                                                     |
| 179 | 1418058_at   | EGF, latrophilin seven transmembrane domain containing 1                                                     |
| 180 | 1448797_at   | Mus musculus ELK3, member of ETS oncogene family (Elk3)                                                      |
| 181 | 1418389_at   | RIKEN cDNA 2810453I06 gene (2810453I06Rik)                                                                   |
| 182 | 1415997_at   | thioredoxin interacting protein                                                                              |

183 1436665\_a\_at latent transforming growth factor beta binding protein 4  
184 1427891\_at immune associated nucleotide 6  
185 1415989\_at RIKEN cDNA clone A730041B10 Mouse vascular cell adhesion molecule-1 mRNA  
186 1415918\_a\_at Triosephosphate isomerase 1  
187 1422978\_at Cytochrome b-245, beta polypeptide  
188 1416589\_at Secreted acidic cysteine rich glycoprotein  
189 1425814\_a\_at Calcitonin receptor-like  
190 1416203\_at Aquaporin 1  
191 1435394\_s\_at ras homolog gene family, member C  
192 1425811\_a\_at cysteine and glycine-rich protein 1  
193 1419648\_at Myosin IC  
194 1434366\_x\_at complement component 1, q subcomponent, beta polypeptide  
195 1417634\_at Superoxide dismutase 3, extracellular  
196 1426025\_s\_at  
197 1421225\_a\_at Solute carrier family 4 (anion exchanger), member 4  
198 1423140\_at lysosomal acid lipase 1  
199 1424375\_s\_at Mus musculus GTPase, IMAP family member 4 (Gimap4), transcript variant 2  
200 1423049\_a\_at Tropomyosin 1, alpha

## Top 200 gene upregulated in Alb-Cre; VHL f/f livers relative to Alb-Cre control livers

| Rank | Probe ID     | Gene Name                                                                                   |
|------|--------------|---------------------------------------------------------------------------------------------|
| 1    | 1434719_at   | alpha-2-macroglobulin                                                                       |
| 2    | 1419248_at   | Regulator of G-protein signaling 2                                                          |
| 3    | 1460351_at   | S100 calcium binding protein A11 (calizzarin)                                               |
| 4    | 1426808_at   | Lectin, galactose binding, soluble 3                                                        |
| 5    | 1460330_at   | annexin A3                                                                                  |
| 6    | 1423484_at   | bicaudal C homolog 1 (Drosophila)                                                           |
| 7    | 1419091_a_at | Annexin A2                                                                                  |
| 8    | 1437185_s_at | M.musculus mRNA for testis-specific thymosin beta-10                                        |
| 9    | 1421375_a_at | S100 calcium binding protein A6 (calcyclin)                                                 |
| 10   | 1426004_a_at | Transglutaminase 2, C polypeptide                                                           |
| 11   | 1437502_x_at | BB560574 RIKEN cDNA clone E530111O22heat stable antigen                                     |
| 12   | 1427473_at   | Glutathione S-transferase, mu 3                                                             |
| 13   | 1417219_s_at | Thymosin, beta 10                                                                           |
| 14   | 1423760_at   | CD44 antigen                                                                                |
| 15   | 1416034_at   | CD24a antigen                                                                               |
| 16   | 1416808_at   | Nidogen 1                                                                                   |
| 17   | 1460259_s_at | Chloride channel calcium activated 2                                                        |
| 18   | 1419149_at   | Serine (or cysteine) proteinase inhibitor, clade E, member 1                                |
| 19   | 1417308_at   | Pyruvate kinase, muscle                                                                     |
| 20   | 1448182_a_at | CD24a antigen                                                                               |
| 21   | 1452217_at   | RIKEN cDNA 2310047C17 gene                                                                  |
| 22   | 1455069_x_at | solute carrier family 25 (mitochondrial carrier; adenine nucleotide translocator), member 4 |
| 23   | 1450138_a_at | Receptor (TNFRSF)-interacting serine-threonine kinase 1                                     |
| 24   | 1417500_a_at | Transglutaminase 2, C polypeptide                                                           |
| 25   | 1420760_s_at | N-myc downstream regulated gene 1                                                           |
| 26   | 1416326_at   | Cysteine-rich protein 1 (intestinal)                                                        |
| 27   | 1416811_s_at | Cytotoxic T lymphocyte-associated protein 2 beta                                            |
| 28   | 1448469_at   | Nidogen 1                                                                                   |
| 29   | 1437308_s_at | AV024285 Mus musculus adult C57BL/6J lung Mus musculus cDNA clone 1200001P22                |
| 30   | 1425567_a_at | Annexin A5                                                                                  |
| 31   | 1448213_at   | RIKEN cDNA C430014K04 gene                                                                  |
| 32   | 1426858_at   | inhibin beta-B                                                                              |
| 33   | 1448392_at   | Secreted acidic cysteine rich glycoprotein                                                  |
| 34   | 1417380_at   | IQ motif containing GTPase activating protein 1                                             |

35 1418649\_at EGL nine homolog 3 (C. elegans)  
36 1427474\_s\_at Glutathione S-transferase, mu 3  
37 1424051\_at Procollagen, type IV, alpha 2  
38 1424562\_a\_at solute carrier family 25 (mitochondrial carrier; adenine nucleotide translocator), member 4  
39 1426529\_a\_at transgelin 2  
40 1449968\_s\_at Acyl-Coenzyme A thioesterase 3, mitochondrial  
41 1416077\_at Adrenomedullin  
42 1456739\_x\_at BB392869 RIKEN cDNA clone C230080O14  
43 1418648\_at EGL nine homolog 3 (C. elegans)  
44 1418572\_x\_at Tumor necrosis factor receptor superfamily, member 12a  
45 1450852\_s\_at coagulation factor II (thrombin) receptor  
46 1452436\_at Lysyl oxidase-like 2  
47 1449360\_at Colony stimulating factor 2 receptor, beta 2, low-affinity (granulocyte-macrophage)  
48 1420911\_a\_at Milk fat globule-EGF factor 8 protein  
49 1416498\_at Peptidylprolyl isomerase C  
50 1434897\_a\_at solute carrier family 25 (mitochondrial carrier; adenine nucleotide translocator), member 4  
51 1429379\_at extra cellular link domain-containing 1  
52 1448393\_at Claudin 7  
53 1420647\_a\_at Keratin complex 2, basic, gene 8  
54 1419123\_a\_at Platelet-derived growth factor, C polypeptide  
55 1423594\_a\_at endothelin receptor type B  
56 1416072\_at CD34 antigen  
57 1423691\_x\_at  
58 1450976\_at N-myc downstream regulated 1  
59 1418073\_at Acyl-Coenzyme A thioesterase 2, mitochondrial  
60 1448162\_at BB250384 RIKENcDNA clone A730041B10Mouse vascular cell adhesion molecule-1 mRNA  
61 1448605\_at Ras homolog gene family, member C  
62 1416431\_at Tubulin, beta 6  
63 1427231\_at roundabout homolog 1 (Drosophila)  
64 1427167\_at expressed sequence AI448196  
65 1416686\_at Procollagen lysine, 2-oxoglutarate 5-dioxygenase 2  
66 1416221\_at follistatin-like 1  
67 1423413\_at N-myc downstream regulated 1  
68 1418571\_at Tumor necrosis factor receptor superfamily, member 12a  
69 1417379\_at IQ motif containing GTPase activating protein 1  
70 1424351\_at WAP four-disulfide core domain 2  
71 1416589\_at Secreted acidic cysteine rich glycoprotein

|     |              |                                                                                              |
|-----|--------------|----------------------------------------------------------------------------------------------|
| 72  | 1435394_s_at | ras homolog gene family, member C                                                            |
| 73  | 1449059_a_at | 3-oxoacid CoA transferase 1                                                                  |
| 74  | 1448323_a_at | Biglycan                                                                                     |
| 75  | 1453128_at   | extra cellular link domain-containing 1                                                      |
| 76  | 1416066_at   | CD9 antigen                                                                                  |
| 77  | 1416165_at   | RIKEN cDNA 1700093E07 gene                                                                   |
| 78  | 1438559_x_at | BB145101 RIKENcDNA clone 9930028G13                                                          |
| 79  | 1434089_at   | synaptopodin                                                                                 |
| 80  | 1435989_x_at | keratin complex 2, basic, gene 8                                                             |
| 81  | 1423062_at   | insulin-like growth factor binding protein 3                                                 |
| 82  | 1430634_a_at | BB076574 RIKENcDNA clone 9330125N24 mRNA for ATP:D-fructose 6-phosphate 1-phosphotransferase |
| 83  | 1415972_at   | myristoylated alanine rich protein kinase C substrate                                        |
| 84  | 1436853_a_at | SYNUCLEIN (HUMAN)                                                                            |
| 85  | 1426278_at   | Interferon, alpha-inducible protein 27                                                       |
| 86  | 1423584_at   | polymerase (RNA) II (DNA directed) polypeptide B                                             |
| 87  | 1423586_at   | AXL receptor tyrosine kinase                                                                 |
| 88  | 1416572_at   | Matrix metalloproteinase 14 (membrane-inserted)                                              |
| 89  | 1436921_at   | ATPase, Cu <sup>++</sup> transporting, alpha polypeptide                                     |
| 90  | 1448169_at   | Keratin complex 1, acidic, gene 18                                                           |
| 91  | 1448383_at   | Matrix metalloproteinase 14 (membrane-inserted)                                              |
| 92  | 1417852_x_at | Chloride channel calcium activated 1                                                         |
| 93  | 1431057_a_at | RIKEN cDNA 2310046G15 gene                                                                   |
| 94  | 1454268_a_at | Cytochrome b-245, alpha polypeptide                                                          |
| 95  | 1415698_at   | Golgi phosphoprotein 2                                                                       |
| 96  | 1415871_at   | Transforming growth factor, beta induced                                                     |
| 97  | 1450883_a_at | CD36 antigen                                                                                 |
| 98  | 1451335_at   | Placenta-specific 8                                                                          |
| 99  | 1455871_s_at | AV139821 Mus musculus C57BL/6J 10-11 day embryo Mus musculus cDNA clone 2810054L14           |
| 100 | 1421326_at   | Colony stimulating factor 2 receptor, beta 1, low-affinity (granulocyte-macrophage)          |
| 101 | 1451475_at   | plexin D1                                                                                    |
| 102 | 1415938_at   | Serine protease inhibitor, Kazal type 3                                                      |
| 103 | 1434998_at   | IQ motif containing GTPase activating protein 1                                              |
| 104 | 1424187_at   | RIKEN cDNA 2610001E17 gene                                                                   |
| 105 | 1423166_at   | CD36 antigen                                                                                 |
| 106 | 1449551_at   | Myosin IC                                                                                    |
| 107 | 1439407_x_at | AV212626 RIKEN cDNA clone 2410115N06transgelin mRNA                                          |
| 108 | 1415989_at   | BB250384 RIKEN cDNA clone A730041B10 Mouse vascular cell adhesion molecule-1 mRNA            |

109 1419589\_at complement component 1, q subcomponent, receptor 1  
110 1437503\_a\_at BB533076 RIKEN cDNA clone E030028E01  
111 1448123\_s\_at Transforming growth factor, beta induced  
112 1421814\_at Moesin  
113 1416514\_a\_at Fascin homolog 1, actin bundling protein (Strongylocentrotus) purpuratus)  
114 1417777\_at Leukotriene B4 12-hydroxydehydrogenase  
115 1454613\_at Transcribed sequence with strong similarity to DPY3\_HUMAN Dihydropyrimidinase related protein-3  
116 1422437\_at procollagen, type V, alpha 2  
117 1415961\_at Integral membrane protein 2C  
118 1455439\_a\_at lectin, galactose binding, soluble 1  
119 1423606\_at periostin, osteoblast specific factor  
120 1420820\_at RIKEN cDNA 2900073G15 gene  
121 1448883\_at Legumain  
122 1416405\_at Biglycan  
123 1425811\_a\_at cysteine and glycine-rich protein 1  
124 1456226\_x\_at discoidin domain receptor family, member 1  
125 1416226\_at PDGFA associated protein 1  
126 1450716\_at A disintegrin-like and metalloprotease (repolysin type) with thrombospondin type 1 motif, 1  
127 1415906\_at Thymosin, beta 4, X chromosome  
128 1433883\_at TROPOMYOSIN 4 homolog [Homo sapiens]  
129 1433428\_x\_at transglutaminase 2, C polypeptide  
130 1448259\_at follistatin-like 1  
131 1419872\_at c-fms proto-oncogene (MOUSE)  
132 1437226\_x\_at MARCKS-like protein  
133 1419247\_at Regulator of G-protein signaling 2  
134 1448591\_at Cathepsin S  
135 1424962\_at Transmembrane 4 superfamily member 4  
136 1426951\_at cysteine-rich motor neuron 1  
137 1449195\_s\_at Chemokine (C-X-C motif) ligand 16  
138 1454086\_a\_at LIM domain only 2  
139 1429177\_x\_at SRY-box containing gene 17  
140 1423721\_at Tropomyosin 1, alpha  
141 1422567\_at Niban protein  
142 1451127\_at Expressed sequence AW146242  
143 1426784\_at tripartite motif protein 47  
144 1437724\_x\_at BB206460 RIKEN cDNA clone A430075P20 membrane-associated phosphatidylinositol transfer protein (mpt1)  
145 1436905\_x\_at lysosomal-associated protein transmembrane 5

146 1456250\_x\_at BB533460 RIKEN cDNA clone E030030E06 (beta ig-h3) mRNA  
147 1415779\_s\_at actin, gamma, cytoplasmic (Actg)  
148 1437889\_x\_at biglycan  
149 1450641\_at Vimentin  
150 1421027\_a\_at myocyte enhancer factor 2C  
151 1419573\_a\_at Lectin, galactose binding, soluble 1  
152 1423049\_a\_at Tropomyosin 1, alpha  
153 1452035\_at procollagen, type IV, alpha 1  
154 1417447\_at Transcription factor 21  
155 1419873\_s\_at c-fms proto-oncogene (MOUSE)  
156 1448061\_at macrophage scavenger receptor 1  
157 1416687\_at Procollagen lysine, 2-oxoglutarate 5-dioxygenase 2  
158 1415864\_at 2,3-bisphosphoglycerate mutase  
159 1436970\_a\_at Mouse pre-PDGF receptor mRNA (MOUSE)  
160 1416985\_at RIKEN cDNA 2900076A13 gene  
161 1417381\_at Complement component 1, q subcomponent, alpha polypeptide  
162 1448592\_at Cartilage associated protein  
163 1449335\_at tissue inhibitor of metalloproteinase 3  
164 1427347\_s\_at Tubulin, beta 2  
165 1429159\_at Adult male cecum cDNA, RIKEN clone:9130010F19 product:unknown EST, full insert sequence  
166 1428850\_x\_at RIKEN cDNA 2410026K10 gene  
167 1416256\_a\_at Tubulin, beta 5  
168 1416268\_at E26 avian leukemia oncogene 2, 3' domain  
169 1436902\_x\_at M.musculus mRNA for testis-specific thymosin beta-10  
170 1415922\_s\_at MARCKS-like protein  
171 1419280\_at Phosphatidylinositol-4-phosphate 5-kinase, type II, alpha  
172 1427483\_at RIKEN cDNA 2610016M12 gene  
173 1426441\_at solute carrier family 11 (proton-coupled divalent metal ion transporters), member 2  
174 1420653\_at Transforming growth factor, beta 1  
175 1430514\_a\_at RIKEN cDNA 2410026K10 gene  
176 1424130\_a\_at Mus musculus mRNA similar to polymerase I and transcript release factor (cDNA clone MGC:13867 IMAGE:4206082)  
177 1426799\_at RAB8B, member RAS oncogene family  
178 1424375\_s\_at GTPase, IMAP family member 4 (Gimap4), transcript variant 2  
179 1428319\_at PDZ and LIM domain 7  
180 1427318\_s\_at fer-1-like 3, myoferlin (C. elegans)  
181 1452352\_at trophoblast specific protein beta  
182 1454959\_s\_at guanine nucleotide binding protein, alpha inhibiting 1

|     |              |                                                                                |
|-----|--------------|--------------------------------------------------------------------------------|
| 183 | 1451860_a_at | Tripartite motif protein 30                                                    |
| 184 | 1425582_a_at | Endomucin                                                                      |
| 185 | 1423550_at   | solute carrier family 1 (glutamate/neutral amino acid transporter), member 4   |
| 186 | 1415971_at   | myristoylated alanine rich protein kinase C substrate                          |
| 187 | 1424254_at   | Interferon induced transmembrane protein 1                                     |
| 188 | 1450850_at   | villin 2                                                                       |
| 189 | 1437277_x_at | transglutaminase 2, C polypeptide                                              |
| 190 | 1424186_at   | RIKEN cDNA 2610001E17 gene                                                     |
| 191 | 1416092_a_at | microtubule-associated protein 4                                               |
| 192 | 1423549_at   | solute carrier family 1 (glutamate/neutral amino acid transporter), member 4   |
| 193 | 1427183_at   | Epidermal growth factor-containing fibulin-like extracellular matrix protein 1 |
| 194 | 1418665_at   | Inositol (myo)-1(or 4)-monophosphatase 2                                       |
| 195 | 1460406_at   | expressed sequence AI427122                                                    |
| 196 | 1416579_a_at | Tumor-associated calcium signal transducer 1                                   |
| 197 | 1448797_at   | ELK3, member of ETS oncogene family (Elk3), transcript variant 2,              |
| 198 | 1416656_at   | Chloride intracellular channel 1                                               |
| 199 | 1450678_at   | Integrin beta 2                                                                |
| 200 | 1433956_at   | cadherin 5                                                                     |



**Top 200 gene differentially expressed in Alb-Cre; HIF1dPA livers versus Alb-Cre; HIF2dPA livers**

note: 1-200 = top 200 genes overexpressed in Alb-Cre:HIF1dPA relative to Alb-Cre:HIF2dPA

note: 200-400 = top 200 genes overexpressed in Alb-Cre:HIF2dPA relative to Alb-Cre:HIF1dPA

| Rank    | Probe ID     | Gene Name                                                                                     |
|---------|--------------|-----------------------------------------------------------------------------------------------|
| HIF1 1  | 1419197_x_at | Hepcidin antimicrobial peptide                                                                |
| HIF1 2  | 1419196_at   | Hepcidin antimicrobial peptide                                                                |
| HIF1 3  | 1454159_a_at | Insulin-like growth factor binding protein 2                                                  |
| HIF1 4  | 1455490_at   | AV027632 Mus musculus adult C57BL/6J liver Mus musculus cDNA clone 1300012G02, mRNA sequence. |
| HIF1 5  | 1451385_at   | RIKEN cDNA 2310056P07 gene                                                                    |
| HIF1 6  | 1450060_at   | Polymeric immunoglobulin receptor                                                             |
| HIF1 7  | 1420525_a_at | Ornithine transcarbamylase                                                                    |
| HIF1 8  | 1417559_at   | sideroflexin 1                                                                                |
| HIF1 9  | 1449486_at   | Carboxylesterase 1                                                                            |
| HIF1 10 | 1419023_x_at | Enolase 1, alpha non-neuron                                                                   |
| HIF1 11 | 1427404_x_at | Enolase 1, alpha non-neuron                                                                   |
| HIF1 12 | 1417560_at   | sideroflexin 1                                                                                |
| HIF1 13 | 1449816_at   | Sulfotransferase family 5A, member 1                                                          |
| HIF1 14 | 1425778_at   | RIKEN cDNA C230043N17 gene                                                                    |
| HIF1 15 | 1418940_at   | Sulfotransferase family 1B, member 1                                                          |
| HIF1 16 | 1438711_at   | pyruvate kinase liver and red blood cell                                                      |
| HIF1 17 | 1425344_at   | RIKEN cDNA 4430402O11 gene                                                                    |
| HIF1 18 | 1448309_at   | Adaptor-related protein complex 3, mu 1 subunit                                               |
| HIF1 19 | 1448350_at   | Argininosuccinate lyase                                                                       |
| HIF1 20 | 1416480_a_at | Hypoxia induced gene 1                                                                        |
| HIF1 21 | 1436615_a_at | ornithine transcarbamylase                                                                    |
| HIF1 22 | 1450725_s_at | Carbonic anhydrase 14                                                                         |
| HIF1 23 | 1448792_a_at | Cytochrome P450, family 2, subfamily f, polypeptide 2                                         |
| HIF1 24 | 1423748_at   | Pyruvate dehydrogenase kinase, isoenzyme 1                                                    |
| HIF1 25 | 1416374_at   | Adaptor-related protein complex 3, mu 1 subunit                                               |
| HIF1 26 | 1418645_at   | Histidine ammonia lyase                                                                       |
| HIF1 27 | 1419687_at   | RIKEN cDNA D930010J01 gene                                                                    |
| HIF1 28 | 1449038_at   | Hydroxysteroid 11-beta dehydrogenase 1                                                        |
| HIF1 29 | 1449385_at   | Hydroxysteroid (17-beta) dehydrogenase 9                                                      |
| HIF1 30 | 1436308_at   | zinc finger protein 292                                                                       |
| HIF1 31 | 1448927_at   | Potassium intermediate/small conductance calcium-activated channel, subfamily N, member 2     |
| HIF1 32 | 1424273_at   | Cytochrome P450, family 2, subfamily c, polypeptide 70                                        |

|      |    |              |                                                                                     |
|------|----|--------------|-------------------------------------------------------------------------------------|
| HIF1 | 33 | 1427214_at   | agmatine ureohydrolase (agmatinase)                                                 |
| HIF1 | 34 | 1418833_at   | Alanine-glyoxylate aminotransferase                                                 |
| HIF1 | 35 | 1424744_at   | Serine dehydratase                                                                  |
| HIF1 | 36 | 1449462_at   | RIKEN cDNA 3110049J23 gene                                                          |
| HIF1 | 37 | 1423747_a_at | Pyruvate dehydrogenase kinase, isoenzyme 1                                          |
| HIF1 | 38 | 1427425_at   | RIKEN cDNA D130005A03 gene                                                          |
| HIF1 | 39 | 1418490_at   | Serine dehydratase-like                                                             |
| HIF1 | 40 | 1425596_at   | Expressed sequence AI317395                                                         |
| HIF1 | 41 | 1418301_at   | interferon regulatory factor 6 (Irf6)                                               |
| HIF1 | 42 | 1421212_at   | ATP-binding cassette, sub-family C (CFTR/MRP), member 6                             |
| HIF1 | 43 | 1451678_at   | RIKEN cDNA 4430402O11 gene                                                          |
| HIF1 | 44 | 1422648_at   | solute carrier family 7 (cationic amino acid transporter, y+ system), member 2      |
| HIF1 | 45 | 1421258_a_at | Pyruvate kinase liver and red blood cell                                            |
| HIF1 | 46 | 1448539_a_at | Aspartoacylase (aminoacylase) 3                                                     |
| HIF1 | 47 | 1426008_a_at | Solute carrier family 7 (cationic amino acid transporter, y+ system), member 2      |
| HIF1 | 48 | 1419510_at   | Esterase 22                                                                         |
| HIF1 | 49 | 1423078_a_at | Sterol-C4-methyl oxidase-like                                                       |
| HIF1 | 50 | 1451122_at   | isopentenyl-diphosphate delta isomerase (Idi1)                                      |
| HIF1 | 51 | 1427370_at   | RIKEN cDNA 1300019J08 gene                                                          |
| HIF1 | 52 | 1417531_at   | 602109616F1 NCI_CGAP_Kid14 Mus musculus cDNA clone IMAGE:4238067 5', mRNA sequence. |
| HIF1 | 53 | 1451501_a_at | Growth hormone receptor                                                             |
| HIF1 | 54 | 1422558_at   | Guanidinoacetate methyltransferase                                                  |
| HIF1 | 55 | 1450133_at   | RIKEN cDNA 2010321J07 gene                                                          |
| HIF1 | 56 | 1436643_x_at | RIKEN cDNA 1810073K19 gene                                                          |
| HIF1 | 57 | 1422479_at   | Acetyl-Coenzyme A synthetase 2 (ADP forming)                                        |
| HIF1 | 58 | 1421259_at   | Pyruvate kinase liver and red blood cell                                            |
| HIF1 | 59 | 1419477_at   | C-type lectin domain family 2, member d                                             |
| HIF1 | 60 | 1449374_at   | Pipecolic acid oxidase                                                              |
| HIF1 | 61 | 1448619_at   | 7-dehydrocholesterol reductase                                                      |
| HIF1 | 62 | 1425392_a_at | Nuclear receptor subfamily 1, group I, member 3                                     |
| HIF1 | 63 | 1419002_s_at | Bile acid-Coenzyme A: amino acid N-acyltransferase                                  |
| HIF1 | 64 | 1456169_at   | Similar to KAT protein (LOC226654), mRNA                                            |
| HIF1 | 65 | 1454712_at   | RIKEN cDNA D130005A03 gene                                                          |
| HIF1 | 66 | 1417890_at   | Pyridoxal (pyridoxine, vitamin B6) phosphatase                                      |
| HIF1 | 67 | 1416049_at   | Glycine decarboxylase                                                               |
| HIF1 | 68 | 1448308_at   | Adaptor-related protein complex 3, mu 1 subunit                                     |
| HIF1 | 69 | 1418923_at   | Solute carrier family 17 (sodium phosphate), member 3                               |

|      |     |              |                                                                                                               |
|------|-----|--------------|---------------------------------------------------------------------------------------------------------------|
| HIF1 | 70  | 1417070_at   | Kallikrein B, plasma 1                                                                                        |
| HIF1 | 71  | 1453287_at   | RIKEN cDNA 5730557B15                                                                                         |
| HIF1 | 72  | 1425034_at   | Solute carrier family 17 (sodium phosphate), member 2                                                         |
| HIF1 | 73  | 1419094_at   | Cytochrome P450, family 2. subfamily c, polypeptide 37                                                        |
| HIF1 | 74  | 1427137_at   | Carboxylesterase 5                                                                                            |
| HIF1 | 75  | 1430388_a_at | sulfatase 2                                                                                                   |
| HIF1 | 76  | 1433855_at   | Transcribed sequence with strong similarity to protein ref:NP_065580.1 (M.musculus) hypothetical protein, I54 |
| HIF1 | 77  | 1421821_at   | Low density lipoprotein receptor                                                                              |
| HIF1 | 78  | 1425365_a_at | Cytochrome P450, family 2, subfamily d, polypeptide 13                                                        |
| HIF1 | 79  | 1423437_at   | glutathione S-transferase, alpha 3                                                                            |
| HIF1 | 80  | 1423804_a_at | isopentenyl-diphosphate delta isomerase (Idi1)                                                                |
| HIF1 | 81  | 1425117_at   | RIKEN cDNA 0610012D14 gene                                                                                    |
| HIF1 | 82  | 1419747_at   | Asialoglycoprotein receptor 2                                                                                 |
| HIF1 | 83  | 1432282_a_at | RIKEN cDNA 2010305C02 gene                                                                                    |
| HIF1 | 84  | 1425559_a_at | SA rat hypertension-associated homolog                                                                        |
| HIF1 | 85  | 1418979_at   | RIKEN cDNA 9030611N15 gene                                                                                    |
| HIF1 | 86  | 1422100_at   | Cytochrome P450, family 7, subfamily a, polypeptide 1                                                         |
| HIF1 | 87  | 1451460_a_at | Solute carrier family 22 (organic anion transporter), member 7                                                |
| HIF1 | 88  | 1438743_at   | cytochrome P450, family 7, subfamily a, polypeptide 1                                                         |
| HIF1 | 89  | 1425107_a_at | Leukemia inhibitory factor receptor                                                                           |
| HIF1 | 90  | 1424493_s_at | Expressed sequence AI746432                                                                                   |
| HIF1 | 91  | 1431803_at   | Cytochrome P450, family 2, subfamily d, polypeptide 13                                                        |
| HIF1 | 92  | 1424171_a_at | Hydroxyacyl glutathione hydrolase                                                                             |
| HIF1 | 93  | 1438183_x_at | AV253518 RIKENcDNA clone 4921501E04 sorbitol dehydrogenase, mRNA sequence.                                    |
| HIF1 | 94  | 1451681_at   | Cis-retinol/3alpha hydroxysterol short-chain dehydrogenase-like                                               |
| HIF1 | 95  | 1424266_s_at | Expressed sequence AU018778                                                                                   |
| HIF1 | 96  | 1428294_at   | Zinc finger protein 259                                                                                       |
| HIF1 | 97  | 1416258_at   | Thymidine kinase 1                                                                                            |
| HIF1 | 98  | 1416481_s_at | Hypoxia induced gene 1                                                                                        |
| HIF1 | 99  | 1423693_at   | Elastase 1, pancreatic                                                                                        |
| HIF1 | 100 | 1450970_at   | glutamate oxaloacetate transaminase 1, soluble                                                                |
| HIF1 | 101 | 1422826_at   | Insulin-like growth factor binding protein, acid labile subunit                                               |
| HIF1 | 102 | 1452583_s_at | galactose mutarotase                                                                                          |
| HIF1 | 103 | 1417707_at   | RIKEN cDNA B230342M21 gene                                                                                    |
| HIF1 | 104 | 1449001_at   | isovaleryl coenzyme A dehydrogenase                                                                           |
| HIF1 | 105 | 1429159_at   | RIKEN clone:9130010F19 product:unknown EST, full insert sequence                                              |
| HIF1 | 106 | 1450646_at   | Cytochrome P450, family 51                                                                                    |

|      |     |              |                                                                                                                  |
|------|-----|--------------|------------------------------------------------------------------------------------------------------------------|
| HIF1 | 107 | 1417071_s_at | Kallikrein B, plasma 1                                                                                           |
| HIF1 | 108 | 1419525_at   | Carbonic anhydrase 5a, mitochondrial                                                                             |
| HIF1 | 109 | 1448426_at   | sarcosine dehydrogenase                                                                                          |
| HIF1 | 110 | 1449321_x_at | Serine (or cysteine) proteinase inhibitor, clade A, member 1a                                                    |
| HIF1 | 111 | 1449062_at   | Ketohexokinase                                                                                                   |
| HIF1 | 112 | 1419618_at   | Butyrobetaine (gamma), 2-oxoglutarate dioxygenase 1 (gamma-butyrobetaine hydroxylase)                            |
| HIF1 | 113 | 1420603_s_at | Retinoic acid early transcript 1E                                                                                |
| HIF1 | 114 | 1418472_at   | Aspartoacylase (aminoacylase) 2                                                                                  |
| HIF1 | 115 | 1416775_at   | RIKEN cDNA 2310004L02 gene                                                                                       |
| HIF1 | 116 | 1420062_at   | uu08g02.x1 cDNA clone IMAGE:3371378 ENV POLYPROTEIN PRECURSOR                                                    |
| HIF1 | 117 | 1434906_at   | RIKEN cDNA 0610005C13 gene                                                                                       |
| HIF1 | 118 | 1417532_at   | 602109616F1 NCI_CGAP_Kid14 Mus musculus cDNA clone IMAGE:4238067 5', mRNA sequence.                              |
| HIF1 | 119 | 1451457_at   | Sterol-C5-desaturase (fungal ERG3, delta-5-desaturase) homolog ( <i>S. cerevisiae</i> )                          |
| HIF1 | 120 | 1451373_at   | Expressed sequence AI746432                                                                                      |
| HIF1 | 121 | 1425326_at   | ATP citrate lyase                                                                                                |
| HIF1 | 122 | 1422478_a_at | Acetyl-Coenzyme A synthetase 2 (ADP forming)                                                                     |
| HIF1 | 123 | 1451548_at   | Uridine phosphorylase 2                                                                                          |
| HIF1 | 124 | 1451771_at   | Two pore channel 1                                                                                               |
| HIF1 | 125 | 1451239_a_at | Solute carrier family 26 (sulfate transporter), member 1                                                         |
| HIF1 | 126 | 1418858_at   | Aldehyde oxidase 3                                                                                               |
| HIF1 | 127 | 1419520_at   | Camello-like 4                                                                                                   |
| HIF1 | 128 | 1418536_at   | histocompatibility 2, Q region locus 7                                                                           |
| HIF1 | 129 | 1449434_at   | Carbonic anhydrase 3                                                                                             |
| HIF1 | 130 | 1455457_at   | Similar to cytochrome P450, subfamily IIC (mephenytoin 4-hydroxylase), polypeptide 19, clone IMAGE:4194050, mRNA |
| HIF1 | 131 | 1422833_at   | Forkhead box A2                                                                                                  |
| HIF1 | 132 | 1449309_at   | Cytochrome P450, family 8, subfamily b, polypeptide 1                                                            |
| HIF1 | 133 | 1418395_at   | RIKEN cDNA 1300013J15 gene                                                                                       |
| HIF1 | 134 | 1424969_s_at | Uridine phosphorylase 2                                                                                          |
| HIF1 | 135 | 1427369_at   | BB071996 RIKENcDNA clone 9030002O03 3', mRNA sequence.                                                           |
| HIF1 | 136 | 1448546_at   | Ras association (RalGDS/AF-6) domain family 3                                                                    |
| HIF1 | 137 | 1419559_at   | Cytochrome P450, family 4, subfamily f, polypeptide 14                                                           |
| HIF1 | 138 | 1423371_at   | polymerase (DNA-directed), epsilon 4 (p12 subunit)                                                               |
| HIF1 | 139 | 1421092_at   | Serine (or cysteine) proteinase inhibitor, clade A (alpha-1 antiproteinase, antitrypsin), member 12              |
| HIF1 | 140 | 1439459_x_at | BB276877 RIKEN cDNA clone A830099I22 ATP citrate-lyase mRNA, mRNA sequence.                                      |
| HIF1 | 141 | 1460256_at   | Carbonic anhydrase 3                                                                                             |
| HIF1 | 142 | 1425241_a_at | WD repeat and SOCS box-containing 1                                                                              |
| HIF1 | 143 | 1422537_a_at | Inhibitor of DNA binding 2                                                                                       |

|      |     |              |                                                                                   |
|------|-----|--------------|-----------------------------------------------------------------------------------|
| HIF1 | 144 | 1422735_at   | Forkhead box Q1                                                                   |
| HIF1 | 145 | 1449046_a_at | RIKEN cDNA 1110007C05 gene                                                        |
| HIF1 | 146 | 1438980_x_at | BB027848 RIKEN cDNA clone 5330439E18                                              |
| HIF1 | 147 | 1424245_at   | Carboxylesterase 2                                                                |
| HIF1 | 148 | 1424692_at   | RIKEN cDNA 2810055F11 gene                                                        |
| HIF1 | 149 | 1423418_at   | farnesyl diphosphate synthetase                                                   |
| HIF1 | 150 | 1425823_at   | Complement component factor h                                                     |
| HIF1 | 151 | 1417946_at   | Abhydrolase domain containing 3                                                   |
| HIF1 | 152 | 1427482_a_at | Carbonic anhydrase 8                                                              |
| HIF1 | 153 | 1451461_a_at | aldolase 3, C isoform                                                             |
| HIF1 | 154 | 1450715_at   | Cytochrome P450, family 1, subfamily a, polypeptide 2                             |
| HIF1 | 155 | 1426223_at   | RIKEN cDNA 2810439F02 gene                                                        |
| HIF1 | 156 | 1417185_at   | Lymphocyte antigen 6 complex, locus A                                             |
| HIF1 | 157 | 1424367_a_at | homer homolog 2 (Drosophila)                                                      |
| HIF1 | 158 | 1423867_at   | 602024493F1 NCI_CGAP_Li9 Mus musculus cDNA clone IMAGE:4159966 5', mRNA sequence. |
| HIF1 | 159 | 1452353_at   | G protein-coupled receptor 155                                                    |
| HIF1 | 160 | 1426037_a_at | Regulator of G-protein signaling 16                                               |
| HIF1 | 161 | 1460232_s_at | Hydroxysteroid dehydrogenase-6, delta<5>-3-beta                                   |
| HIF1 | 162 | 1422198_a_at | Serine hydroxymethyl transferase 1 (soluble)                                      |
| HIF1 | 163 | 1451488_at   | RIKEN cDNA 1110028A07 gene                                                        |
| HIF1 | 164 | 1449047_at   | RIKEN cDNA 1600020H07 gene                                                        |
| HIF1 | 165 | 1451600_s_at | Esterase 31-like                                                                  |
| HIF1 | 166 | 1418446_at   | solute carrier family 16 (monocarboxylic acid transporters), member 2             |
| HIF1 | 167 | 1447919_x_at | NADH dehydrogenase (ubiquinone) 1, alpha/beta subcomplex, 1                       |
| HIF1 | 168 | 1419074_at   | RIKEN cDNA 2510006C20 gene                                                        |
| HIF1 | 169 | 1418804_at   | Succinate receptor 1                                                              |
| HIF1 | 170 | 1419436_at   | Complement component factor h-like 1                                              |
| HIF1 | 171 | 1432099_a_at | Proline dehydrogenase (oxidase) 2                                                 |
| HIF1 | 172 | 1449585_at   | interleukin 1 receptor accessory protein (Il1rap), transcript variant 2           |
| HIF1 | 173 | 1448136_at   | Ectonucleotide pyrophosphatase/phosphodiesterase 2                                |
| HIF1 | 174 | 1448741_at   | Solute carrier family 3, member 1                                                 |
| HIF1 | 175 | 1421987_at   | 3'-phosphoadenosine 5'-phosphosulfate synthase 2                                  |
| HIF1 | 176 | 1434272_at   | cytoplasmic polyadenylation element binding protein 2                             |
| HIF1 | 177 | 1451716_at   | v-maf musculoaponeurotic fibrosarcoma oncogene family, protein B (avian)          |
| HIF1 | 178 | 1451260_at   | Aldehyde dehydrogenase 1 family, member B1                                        |
| HIF1 | 179 | 1427631_x_at | major urinary protein 3                                                           |
| HIF1 | 180 | 1424815_at   | Glycogen synthase 2                                                               |

|      |     |              |                                                                                                        |
|------|-----|--------------|--------------------------------------------------------------------------------------------------------|
| HIF1 | 181 | 1421075_s_at | Cytochrome P450, family 7, subfamily b, polypeptide 1                                                  |
| HIF1 | 182 | 1455696_a_at | PRP4 pre-mRNA processing factor 4 homolog B (yeast)                                                    |
| HIF1 | 183 | 1427302_at   | ectonucleotide pyrophosphatase/phosphodiesterase 3                                                     |
| HIF1 | 184 | 1421989_s_at | 3'-phosphoadenosine 5'-phosphosulfate synthase 2                                                       |
| HIF1 | 185 | 1435176_a_at | inhibitor of DNA binding 2                                                                             |
| HIF1 | 186 | 1450112_a_at | Growth arrest specific 2                                                                               |
| HIF1 | 187 | 1429144_at   | RIKEN cDNA 2310032D16 gene                                                                             |
| HIF1 | 188 | 1418356_at   | Mercaptopyruvate sulfurtransferase                                                                     |
| HIF1 | 189 | 1455265_a_at | BB100249 RIKEN cDNA clone 9430072A08 etinally abundant regulator of G-protein signaling mRGS-r (RGS-r) |
| HIF1 | 190 | 1451670_at   | RIKEN cDNA 1810048P08 gene                                                                             |
| HIF1 | 191 | 1428022_at   | Lipocalin 13                                                                                           |
| HIF1 | 192 | 1421074_at   | Cytochrome P450, family 7, subfamily b, polypeptide 1                                                  |
| HIF1 | 193 | 1451452_a_at | Regulator of G-protein signaling 16                                                                    |
| HIF1 | 194 | 1427052_at   | acetyl-Coenzyme A carboxylase beta                                                                     |
| HIF1 | 195 | 1428502_at   | ARP6 actin-related protein 6 homolog (yeast)                                                           |
| HIF1 | 196 | 1425837_a_at | CCR4 carbon catabolite repression 4-like ( <i>S. cerevisiae</i> )                                      |
| HIF1 | 197 | 1417991_at   | Deiodinase, iodothyronine, type I                                                                      |
| HIF1 | 198 | 1418265_s_at | Interferon regulatory factor 2                                                                         |
| HIF1 | 199 | 1416833_at   | Kidney expressed gene 1                                                                                |
| HIF1 | 200 | 1418654_at   | Hydroxyacid oxidase (glycolate oxidase) 3                                                              |
| HIF2 | 201 | 1419149_at   | Serine (or cysteine) proteinase inhibitor, clade E, member 1                                           |
| HIF2 | 202 | 1427473_at   | Glutathione S-transferase, mu 3                                                                        |
| HIF2 | 203 | 1426441_at   | solute carrier family 11 (proton-coupled divalent metal ion transporters), member 2                    |
| HIF2 | 204 | 1423549_at   | solute carrier family 1 (glutamate/neutral amino acid transporter), member 4                           |
| HIF2 | 205 | 1427231_at   | roundabout homolog 1 ( <i>Drosophila</i> )                                                             |
| HIF2 | 206 | 1425567_a_at | Annexin A5                                                                                             |
| HIF2 | 207 | 1427474_s_at | Glutathione S-transferase, mu 3                                                                        |
| HIF2 | 208 | 1424051_at   | Procollagen, type IV, alpha 2                                                                          |
| HIF2 | 209 | 1448392_at   | Secreted acidic cysteine rich glycoprotein                                                             |
| HIF2 | 210 | 1423550_at   | solute carrier family 1 (glutamate/neutral amino acid transporter), member 4                           |
| HIF2 | 211 | 1417761_at   | Hypothetical LOC403343                                                                                 |
| HIF2 | 212 | 1420678_a_at | Interleukin 17 receptor B                                                                              |
| HIF2 | 213 | 1417714_x_at | Hemoglobin alpha, adult chain 1                                                                        |
| HIF2 | 214 | 1417500_a_at | Transglutaminase 2, C polypeptide                                                                      |
| HIF2 | 215 | 1449254_at   | Secreted phosphoprotein 1                                                                              |
| HIF2 | 216 | 1416589_at   | Secreted acidic cysteine rich glycoprotein                                                             |
| HIF2 | 217 | 1418946_at   | ST3 beta-galactoside alpha-2,3-sialyltransferase 1                                                     |

HIF2 218 1427866\_x\_at transcript down-regulated by Coxsackievirus B3 infection; Mus musculus beta globin mRNA, partial cds.  
HIF2 219 1433428\_x\_at transglutaminase 2, C polypeptide  
HIF2 220 1427391\_a\_at cytochrome c oxidase, subunit VIIa 2  
HIF2 221 1416498\_at Peptidylprolyl isomerase C  
HIF2 222 1455900\_x\_at BB041811 RIKEN cDNA clone 6030458C10 transglutaminase (TGase) mRNA  
HIF2 223 1452035\_at procollagen, type IV, alpha 1  
HIF2 224 1427167\_at expressed sequence AI448196  
HIF2 225 1451008\_at BB360510 RIKEN cDNA clone C030047J18 alpha2,8-sialyltransferase  
HIF2 226 1424133\_at RIKEN cDNA 6530411B15 gene  
HIF2 227 1425458\_a\_at Growth factor receptor bound protein 10  
HIF2 228 1423484\_at bicaudal C homolog 1 (Drosophila)  
HIF2 229 1434719\_at alpha-2-macroglobulin  
HIF2 230 1456616\_a\_at AV035166 Mus musculus adult C57BL/6J placenta Mus musculus cDNA clone 1600013O06, mRNA sequence.  
HIF2 231 1418181\_at Protein tyrosine phosphatase 4a3  
HIF2 232 1416411\_at Glutathione S-transferase, mu 2  
HIF2 233 1417399\_at Growth arrest specific 6  
HIF2 234 1426348\_at procollagen, type IV, alpha 1  
HIF2 235 1452078\_a\_at solute carrier family 11 (proton-coupled divalent metal ion transporters), member 2  
HIF2 236 1436504\_x\_at AV027367 Mus musculus adult C57BL/6J liver Mus musculus cDNA clone 1300008D03, mRNA sequence.  
HIF2 237 1437277\_x\_at transglutaminase 2, C polypeptide  
HIF2 238 1416811\_s\_at Cytotoxic T lymphocyte-associated protein 2 beta  
HIF2 239 1451263\_a\_at Fatty acid binding protein 4, adipocyte  
HIF2 240 1448471\_a\_at Cytotoxic T lymphocyte-associated protein 2 beta  
HIF2 241 1417821\_at DNA segment, Chr 17, human D6S56E 5  
HIF2 242 1455439\_a\_at lectin, galactose binding, soluble 1  
HIF2 243 1419247\_at Regulator of G-protein signaling 2  
HIF2 244 1434089\_at synaptopodin  
HIF2 245 1437226\_x\_at MARCKS-like protein  
HIF2 246 1418649\_at EGL nine homolog 3 (C. elegans)  
HIF2 247 1454971\_x\_at Transcribed sequences  
HIF2 248 1423166\_at CD36 antigen  
HIF2 249 1417023\_a\_at Fatty acid binding protein 4, adipocyte  
HIF2 250 1428850\_x\_at RIKEN cDNA 2410026K10 gene  
HIF2 251 1455504\_a\_at makorin, ring finger protein, 1  
HIF2 252 1425742\_a\_at RIKEN cDNA D430022A14 gene  
HIF2 253 1415919\_at Neural proliferation, differentiation and control gene 1  
HIF2 254 1423141\_at lysosomal acid lipase 1

|      |     |              |                                                                                               |
|------|-----|--------------|-----------------------------------------------------------------------------------------------|
| HIF2 | 255 | 1448416_at   | Matrix gamma-carboxyglutamate (gla) protein                                                   |
| HIF2 | 256 | 1419248_at   | Regulator of G-protein signaling 2                                                            |
| HIF2 | 257 | 1448119_at   | 2,3-bisphosphoglycerate mutase                                                                |
| HIF2 | 258 | 1421267_a_at | Cbp/p300-interacting transactivator, with Glu/Asp-rich carboxy-terminal domain, 2             |
| HIF2 | 259 | 1424962_at   | Transmembrane 4 superfamily member 4                                                          |
| HIF2 | 260 | 1419589_at   | complement component 1, q subcomponent, receptor 1                                            |
| HIF2 | 261 | 1426004_a_at | Transglutaminase 2, C polypeptide                                                             |
| HIF2 | 262 | 1416609_at   | CDNA sequence BC004004                                                                        |
| HIF2 | 263 | 1435394_s_at | ras homolog gene family, member C                                                             |
| HIF2 | 264 | 1416041_at   | Serum/glucocorticoid regulated kinase                                                         |
| HIF2 | 265 | 1453128_at   | extra cellular link domain-containing 1                                                       |
| HIF2 | 266 | 1418435_at   | makorin, ring finger protein, 1                                                               |
| HIF2 | 267 | 1448605_at   | Ras homolog gene family, member C                                                             |
| HIF2 | 268 | 1452889_at   | Similar to phospholysine phosphohistidine inorganic pyrophosphate phosphata (LOC384677), mRNA |
| HIF2 | 269 | 1423140_at   | lysosomal acid lipase 1                                                                       |
| HIF2 | 270 | 1448182_a_at | CD24a antigen                                                                                 |
| HIF2 | 271 | 1424375_s_at | GTPase, IMAP family member 4 (Gimap4), transcript variant 2,                                  |
| HIF2 | 272 | 1416808_at   | Nidogen 1                                                                                     |
| HIF2 | 273 | 1456700_x_at | BB100920 RIKEN cDNA clone 9430074M04                                                          |
| HIF2 | 274 | 1419300_at   | FMS-like tyrosine kinase 1                                                                    |
| HIF2 | 275 | 1450958_at   | transmembrane 4 superfamily member 1                                                          |
| HIF2 | 276 | 1415973_at   | myristoylated alanine rich protein kinase C substrate                                         |
| HIF2 | 277 | 1420965_a_at | ectodermal-neural cortex 1                                                                    |
| HIF2 | 278 | 1423986_a_at | scotin gene (Scotin)                                                                          |
| HIF2 | 279 | 1416034_at   | CD24a antigen                                                                                 |
| HIF2 | 280 | 1416066_at   | CD9 antigen                                                                                   |
| HIF2 | 281 | 1419573_a_at | Lectin, galactose binding, soluble 1                                                          |
| HIF2 | 282 | 1450883_a_at | CD36 antigen                                                                                  |
| HIF2 | 283 | 1450342_at   | Bone morphogenetic protein 8b                                                                 |
| HIF2 | 284 | 1428361_x_at | RIKEN clone:2510049A20 product:hemoglobin, beta adult major chain                             |
| HIF2 | 285 | 1422437_at   | procollagen, type V, alpha 2                                                                  |
| HIF2 | 286 | 1423465_at   | stromal cell derived factor receptor 2                                                        |
| HIF2 | 287 | 1452661_at   | Transferrin receptor                                                                          |
| HIF2 | 288 | 1417308_at   | Pyruvate kinase, muscle                                                                       |
| HIF2 | 289 | 1452757_s_at | RIKEN clone:2510049A20 product:hemoglobin, beta adult major chain                             |
| HIF2 | 290 | 1417184_s_at | Hemoglobin Z, beta-like embryonic chain                                                       |
| HIF2 | 291 | 1415922_s_at | MARCKS-like protein                                                                           |



|      |     |              |                                                                                             |
|------|-----|--------------|---------------------------------------------------------------------------------------------|
| HIF2 | 292 | 1420653_at   | Transforming growth factor, beta 1                                                          |
| HIF2 | 293 | 1417379_at   | IQ motif containing GTPase activating protein 1                                             |
| HIF2 | 294 | 1417300_at   | Sphingomyelin phosphodiesterase, acid-like 3B                                               |
| HIF2 | 295 | 1448021_at   | Transcribed sequences                                                                       |
| HIF2 | 296 | 1420911_a_at | Milk fat globule-EGF factor 8 protein                                                       |
| HIF2 | 297 | 1421009_at   | RIKEN cDNA 2510004L01 gene                                                                  |
| HIF2 | 298 | 1415865_s_at | 2,3-bisphosphoglycerate mutase                                                              |
| HIF2 | 299 | 1452784_at   | integrin alpha V                                                                            |
| HIF2 | 300 | 1452445_at   | RIKEN cDNA A230035L05 gene                                                                  |
| HIF2 | 301 | 1429379_at   | extra cellular link domain-containing 1                                                     |
| HIF2 | 302 | 1424485_at   | Angiopoietin-like 3                                                                         |
| HIF2 | 303 | 1451428_x_at | EGF-like domain 7 (Egfl7), transcript variant c                                             |
| HIF2 | 304 | 1436902_x_at | M.musculus mRNA for testis-specific thymosin beta-10                                        |
| HIF2 | 305 | 1424131_at   | procollagen, type VI, alpha 3                                                               |
| HIF2 | 306 | 1419569_a_at | Interferon-stimulated protein                                                               |
| HIF2 | 307 | 1428942_at   | metallothionein 2                                                                           |
| HIF2 | 308 | 1423321_at   | myeloid-associated differentiation marker                                                   |
| HIF2 | 309 | 1436058_at   | RIKEN cDNA 2510004L01 gene                                                                  |
| HIF2 | 310 | 1454758_a_at | transforming growth factor beta 1 induced transcript 4                                      |
| HIF2 | 311 | 1418084_at   | RIKEN cDNA D030005H02 gene                                                                  |
| HIF2 | 312 | 1421814_at   | Moesin                                                                                      |
| HIF2 | 313 | 1434437_x_at | AV301324 RIKEN cDNA clone 5730492P22 ibonucleotide reductase M2 subunit mRNA                |
| HIF2 | 314 | 1418648_at   | EGL nine homolog 3 (C. elegans)                                                             |
| HIF2 | 315 | 1415971_at   | myristoylated alanine rich protein kinase C substrate                                       |
| HIF2 | 316 | 1450699_at   | Selenium binding protein 1                                                                  |
| HIF2 | 317 | 1436905_x_at | lysosomal-associated protein transmembrane 5                                                |
| HIF2 | 318 | 1415864_at   | 2,3-bisphosphoglycerate mutase                                                              |
| HIF2 | 319 | 1450061_at   | ectodermal-neural cortex 1                                                                  |
| HIF2 | 320 | 1427442_a_at | Amyloid beta (A4) precursor protein                                                         |
| HIF2 | 321 | 1415906_at   | Thymosin, beta 4, X chromosome                                                              |
| HIF2 | 322 | 1449193_at   | CD5 antigen-like                                                                            |
| HIF2 | 323 | 1456388_at   | ATPase, class VI, type 11A                                                                  |
| HIF2 | 324 | 1448188_at   | Uncoupling protein 2 (mitochondrial, proton carrier)                                        |
| HIF2 | 325 | 1425811_a_at | cysteine and glycine-rich protein 1                                                         |
| HIF2 | 326 | 1448383_at   | Matrix metalloproteinase 14 (membrane-inserted)                                             |
| HIF2 | 327 | 1434897_a_at | solute carrier family 25 (mitochondrial carrier; adenine nucleotide translocator), member 4 |
| HIF2 | 328 | 1426951_at   | cysteine-rich motor neuron 1                                                                |

|      |     |              |                                                                                              |
|------|-----|--------------|----------------------------------------------------------------------------------------------|
| HIF2 | 329 | 1453556_x_at | RIKEN cDNA 2410026K10 gene                                                                   |
| HIF2 | 330 | 1452207_at   |                                                                                              |
| HIF2 | 331 | 1418493_a_at | Synuclein, alpha                                                                             |
| HIF2 | 332 | 1415972_at   | myristoylated alanine rich protein kinase C substrate                                        |
| HIF2 | 333 | 1433765_at   | RIKEN cDNA B230113M03 gene                                                                   |
| HIF2 | 334 | 1449890_at   | RIKEN cDNA 0610033E06 gene                                                                   |
| HIF2 | 335 | 1450852_s_at | coagulation factor II (thrombin) receptor                                                    |
| HIF2 | 336 | 1425933_a_at | 5'-nucleotidase, cytosolic II                                                                |
| HIF2 | 337 | 1417355_at   | Paternally expressed 3                                                                       |
| HIF2 | 338 | 1448892_at   | Dedicator of cytokinesis 7                                                                   |
| HIF2 | 339 | 1416268_at   | E26 avian leukemia oncogene 2, 3' domain                                                     |
| HIF2 | 340 | 1419059_at   | Serum amyloid P-component                                                                    |
| HIF2 | 341 | 1433956_at   | cadherin 5                                                                                   |
| HIF2 | 342 | 1417750_a_at | mitochondrial solute carrier protein (Mscp)                                                  |
| HIF2 | 343 | 1448469_at   | Nidogen 1                                                                                    |
| HIF2 | 344 | 1424186_at   | RIKEN cDNA 2610001E17 gene                                                                   |
| HIF2 | 345 | 1448162_at   | BB250384 RIKENcDNA clone A730041B10 Mouse vascular cell adhesion molecule-1 mRNA             |
| HIF2 | 346 | 1460196_at   | Similar to Carbonyl reductase [NADPH] 1 (NADPH-dependent carbonyl reductase 1)               |
| HIF2 | 347 | 1423630_at   | cytoglobin                                                                                   |
| HIF2 | 348 | 1451475_at   | plexin D1                                                                                    |
| HIF2 | 349 | 1418918_at   | Insulin-like growth factor binding protein 1                                                 |
| HIF2 | 350 | 1437185_s_at | M.musculus mRNA for testis-specific thymosin beta-10                                         |
| HIF2 | 351 | 1451335_at   | Placenta-specific 8                                                                          |
| HIF2 | 352 | 1428097_at   | RIKEN cDNA 2510009E07 gene                                                                   |
| HIF2 | 353 | 1437308_s_at | AV024285 Mus musculus adult C57BL/6J lung Mus musculus cDNA clone 1200001P22, mRNA sequence. |
| HIF2 | 354 | 1416464_at   | Solute carrier family 4 (anion exchanger), member 1                                          |
| HIF2 | 355 | 1450138_a_at | Receptor (TNFRSF)-interacting serine-threonine kinase 1                                      |
| HIF2 | 356 | 1436853_a_at | mh26h04.x1 SYNUCLEIN (HUMAN)                                                                 |
| HIF2 | 357 | 1423584_at   | polymerase (RNA) II (DNA directed) polypeptide B                                             |
| HIF2 | 358 | 1437726_x_at | BB111335 RIKEN cDNA clone 9530029K06 complement protein C1q B-chain                          |
| HIF2 | 359 | 1438377_x_at | BB497312 RIKEN cDNA clone D630008E06 (NADC3) mRNA                                            |
| HIF2 | 360 | 1418949_at   | Growth differentiation factor 15                                                             |
| HIF2 | 361 | 1448797_at   | ELK3, member of ETS oncogene family (Elk3), transcript variant 2                             |
| HIF2 | 362 | 1427883_a_at | procollagen, type III, alpha 1                                                               |
| HIF2 | 363 | 1423586_at   | AXL receptor tyrosine kinase                                                                 |
| HIF2 | 364 | 1452163_at   | E26 avian leukemia oncogene 1, 5' domain                                                     |
| HIF2 | 365 | 1421008_at   | RIKEN cDNA 2510004L01 gene                                                                   |

|      |     |              |                                                                                   |
|------|-----|--------------|-----------------------------------------------------------------------------------|
| HIF2 | 366 | 1417380_at   | IQ motif containing GTPase activating protein 1                                   |
| HIF2 | 367 | 1416895_at   | Ephrin A1                                                                         |
| HIF2 | 368 | 1417017_at   | Cytochrome P450, family 17, subfamily a, polypeptide 1                            |
| HIF2 | 369 | 1449106_at   | Glutathione peroxidase 3                                                          |
| HIF2 | 370 | 1421425_a_at | Down syndrome critical region gene 1-like 1                                       |
| HIF2 | 371 | 1433924_at   | paternally expressed 3                                                            |
| HIF2 | 372 | 1417376_a_at | Immunoglobulin superfamily, member 4A                                             |
| HIF2 | 373 | 1451975_at   | RIKEN cDNA 2810453I06 gene                                                        |
| HIF2 | 374 | 1424040_at   | CDNA sequence BC019977                                                            |
| HIF2 | 375 | 1419872_at   | c-fms proto-oncogene (MOUSE);, mRNA sequence.                                     |
| HIF2 | 376 | 1434148_at   | transcription factor 4                                                            |
| HIF2 | 377 | 1449401_at   | Complement component 1, q subcomponent, gamma polypeptide                         |
| HIF2 | 378 | 1426858_at   | inhibin beta-B                                                                    |
| HIF2 | 379 | 1430514_a_at | RIKEN cDNA 2410026K10 gene                                                        |
| HIF2 | 380 | 1436921_at   | ATPase, Cu <sup>++</sup> transporting, alpha polypeptide                          |
| HIF2 | 381 | 1452666_a_at | Transmembrane and coiled-coil domains 2                                           |
| HIF2 | 382 | 1448944_at   | RIKEN cDNA D030005H02 gene                                                        |
| HIF2 | 383 | 1454268_a_at | Cytochrome b-245, alpha polypeptide                                               |
| HIF2 | 384 | 1417822_at   | DNA segment, Chr 17, human D6S56E 5                                               |
| HIF2 | 385 | 1437502_x_at | BB560574 RIKEN cDNA clone E530111O22 mRNA for heat stable antigen, mRNA sequence. |
| HIF2 | 386 | 1433899_x_at | transforming growth factor beta 1 induced transcript 4                            |
| HIF2 | 387 | 1418571_at   | Tumor necrosis factor receptor superfamily, member 12a                            |
| HIF2 | 388 | 1448883_at   | Legumain                                                                          |
| HIF2 | 389 | 1456028_x_at | myristoylated alanine rich protein kinase C substrate                             |
| HIF2 | 390 | 1419394_s_at | S100 calcium binding protein A8 (calgranulin A)                                   |
| HIF2 | 391 | 1448529_at   | Thrombomodulin                                                                    |
| HIF2 | 392 | 1423062_at   | insulin-like growth factor binding protein 3                                      |
| HIF2 | 393 | 1427889_at   | spectrin alpha 2                                                                  |
| HIF2 | 394 | 1418572_x_at | Tumor necrosis factor receptor superfamily, member 12a                            |
| HIF2 | 395 | 1427747_a_at | Lipocalin 2                                                                       |
| HIF2 | 396 | 1424599_at   | Fibrinogen-like protein 1                                                         |
| HIF2 | 397 | 1416779_at   | serum deprivation response                                                        |
| HIF2 | 398 | 1417219_s_at | Thymosin, beta 10                                                                 |
| HIF2 | 399 | 1449905_at   | C-type lectin domain family 4, member f                                           |
| HIF2 | 400 | 1416572_at   | Matrix metalloproteinase 14 (membrane-inserted)                                   |
