# Supplementary material
Source: PubMed Central journal article supplement (PMC1589988)

## Supplemental Fig 1A

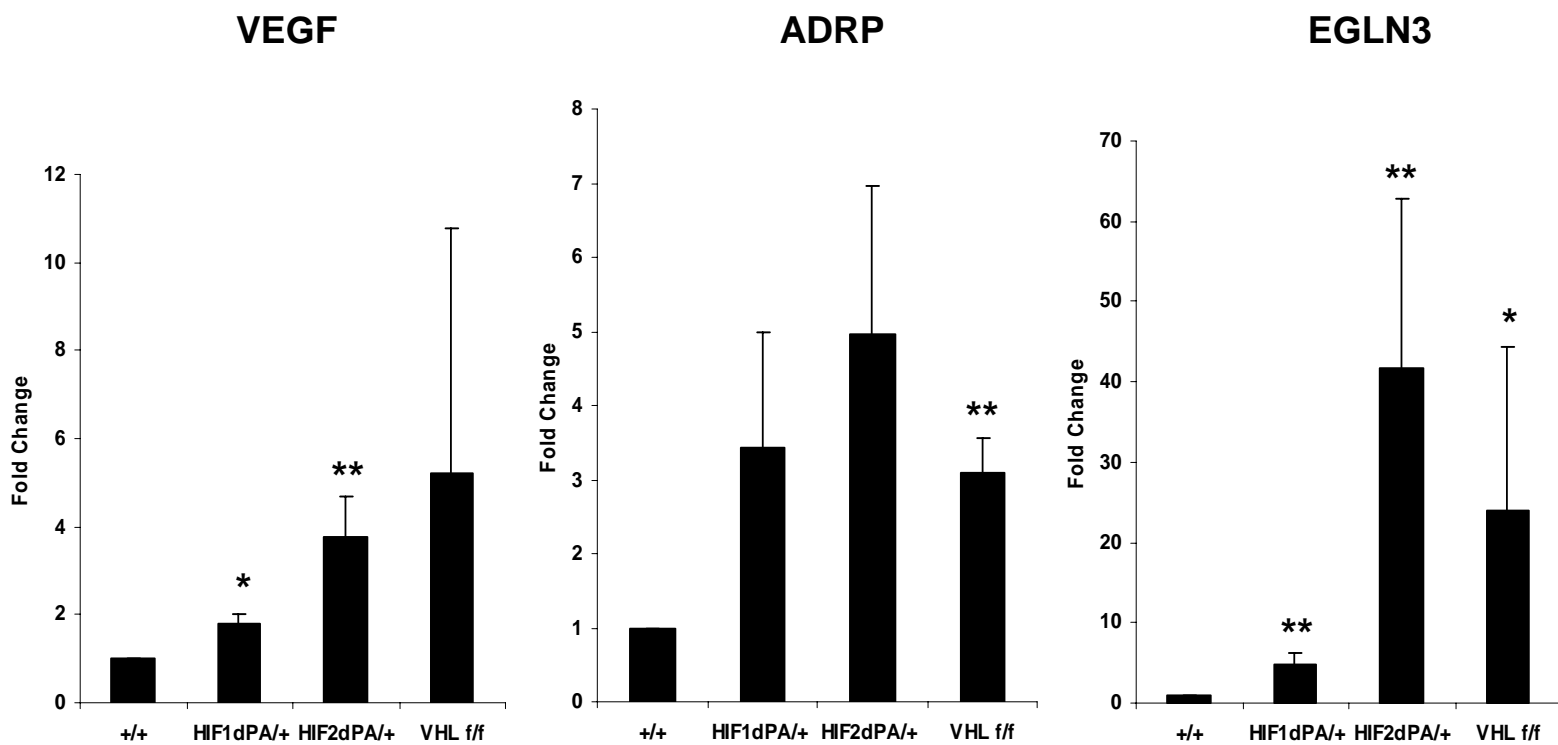

## Supplemental Fig 1B

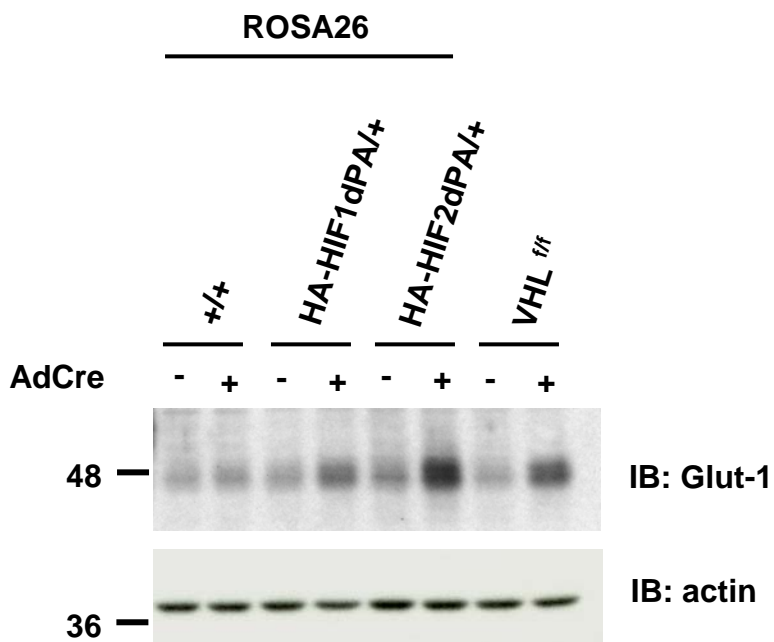

Supplement: 7601300s1.pdf [file 7601300s1.pdf]
